1 **Glycosylation of bioactive C<sub>13</sub>-apocarotenols in *Nicotiana***  
2 ***benthamiana* and *Mentha × piperita***

3  
4 Guangxin Sun<sup>1</sup>, Natalia Putkaradze<sup>2</sup>, Sina Bohnacker<sup>1</sup>, Rafal Jonczyk<sup>1</sup>, Tarik Fida<sup>1</sup>,  
5 Thomas Hoffmann<sup>1</sup>, Rita Bernhardt<sup>2</sup>, Katja Härtl<sup>1</sup>, Wilfried Schwab<sup>1\*</sup>

6  
7 <sup>1</sup> Biotechnology of Natural Products, Technische Universität München, Liesel-  
8 Beckmann-Str. 1, 85354 Freising, Germany

9 <sup>2</sup> Institut für Biochemie, Universität des Saarlandes, Campus B2 2, D-66123  
10 Saarbrücken, Germany

11 \*Tel.: +49 8161 712912. Fax: +49 8161 712950. E-mail: [wilfried.schwab@tum.de](mailto:wilfried.schwab@tum.de)

12  
13 **Author contributions**

14 G.S., N.P., R.J., and W.S. conceived the experiments; G.S., N.P., R.J., T.F., and S.B.  
15 carried out the experiments; T.H. supervised the experiments; G.S. and T.H. carried  
16 out the data analysis; G.S. wrote a draft of the manuscript; W.S. and K.H. completed  
17 the manuscript; R.B., K.H. and W.S. corrected the manuscript.

18  
19  
20 **ORCID**

21 Guangxin Sun: 0000-0001-6036-8809

22 Natalia Putkaradze: 0000-0001-5401-8378

23 Wilfried Schwab: 0000-0002-9753-3967

24 Rita Bernhardt: 0000-0003-0961-7755

25 Katja Härtl: 0000-0003-0112-2694

26 Fong-Chin Huang: 0000-0002-0766-6900

27 [guangxin.sun@tum.de](mailto:guangxin.sun@tum.de); [nataliaputkaradze@gmail.com](mailto:nataliaputkaradze@gmail.com); [sina.bohnacker@tum.de](mailto:sina.bohnacker@tum.de);

28 [rafal.jonczyk@tum.de](mailto:rafal.jonczyk@tum.de); [tarik.fida@tum.de](mailto:tarik.fida@tum.de); [tom.hoffmann@tum.de](mailto:tom.hoffmann@tum.de); [29 \[saarland.de\]\(mailto:saarland.de\); \[wilfried.schwab@tum.de\]\(mailto:wilfried.schwab@tum.de\)](mailto:ritabern@mx.uni-</a></p></div><div data-bbox=)

30  
31  
32 **Running title**

33 C<sub>13</sub>-Apocarotenyl glycosyltransferases from plants

## 34 **Summary**

35 C<sub>13</sub>-apocarotenoids (norisoprenoids) are carotenoid-derived oxidation products,  
36 which perform important physiological functions in plants. Although their biosynthetic  
37 pathways have been extensively studied, their metabolism including glycosylation  
38 remains elusive. Candidate uridine-diphosphate glycosyltransferase genes (*UGTs*)  
39 were selected for their high transcript abundance in comparison with other *UGTs* in  
40 vegetative tissues of *Nicotiana benthamiana* and *Mentha x piperita*, as these tissues  
41 are rich sources of apocarotenoid glucosides. Hydroxylated C<sub>13</sub>-apocarotenol  
42 substrates were produced by P450-catalyzed biotransformation and microbial/plant  
43 enzyme systems were established for the synthesis of glycosides. Natural substrates  
44 were identified by physiological aglycone libraries prepared from isolated plant  
45 glycosides. In total, we identified six *UGTs* that catalyze the unprecedented  
46 glycosylation of C<sub>13</sub>-apocarotenols, where glucose is bound either to the cyclohexene  
47 ring or butane side chain. MpUGT86C10 is a superior novel enzyme that catalyzes  
48 the glycosylation of allelopathic 3-hydroxy- $\alpha$ -damascone, 3-oxo- $\alpha$ -ionol, 3-oxo-7,8-  
49 dihydro- $\alpha$ -ionol (Blumenol C) and 3-hydroxy-7,8-dihydro- $\beta$ -ionol, while a germination  
50 test demonstrated the higher phytotoxic potential of a norisoprenoid glucoside in  
51 comparison to its aglycone. Glycosylation of C<sub>13</sub>-apocarotenoids has several  
52 functions in plants, including increased allelopathic activity of the aglycone, facilitating  
53 exudation by roots and allowing symbiosis with arbuscular mycorrhizal fungi. The  
54 results enable in-depth analyses of the roles of glycosylated norisoprenoid  
55 allelochemicals, the physiological functions of apocarotenoids during arbuscular  
56 mycorrhizal colonization and the associated maintenance of carotenoid homeostasis.

57  
58 **Key words:** glycosyltransferase, apocarotenoid, allelochemical, *Mentha x piperita*,  
59 *Nicotiana benthamiana*, cytochrome P450

## 60 **One-sentence summary**

61 We identified six transferases in *Nicotiana benthamiana* and *Mentha x piperita*, two  
62 rich sources of glycosylated apocarotenoids that catalyze the unprecedented  
63 glycosylation of a range of hydroxylated  $\alpha$ - and  $\beta$ -ionone/ionol derivatives and were  
64 able to modify bioactivity by glycosylation.

## 65 Introduction

66 Plants synthesize a number of C<sub>40</sub> lipid-soluble colorful carotenoids and oxygen-  
67 bearing xanthophylls from C<sub>5</sub> isopentenyl building blocks, which are essential for  
68 photosynthesis and –protection (Giuliano 2014; Tian 2015). They occur in all  
69 photosynthetic organisms (higher plants, algae, and cyanobacteria) as well as some  
70 non-photosynthetic microbes (fungi and bacteria) (Cazzonelli and Pogson 2010;  
71 Walter and Strack 2011; Zhang 2018). When produced in petals and other parts of  
72 flowers carotenoids/xanthophylls act as visual signals to attract pollinators, while they  
73 decoy seed-dispersing animals when accumulated in fruits. Therefore, C<sub>40</sub>-  
74 isoprenoids are also essential for plant reproduction (Wurtzel 2019). Chloroplast-  
75 associated carotenoids stabilize membranes, and are required to form prolamellar  
76 bodies (Park et al. 2002).

77 Besides, carotenoids/xanthophylls are precursors of apocarotenoids, which are  
78 formed by carotenoid cleavage oxygenases (CCOs) and have important functions in  
79 plant development, growth, architecture, and plant-environment interactions such as  
80 the attraction of pollinators and the defense against pathogens and herbivores (Hou  
81 et al. 2016; Nisar et al. 2015; Ohmiya et al. 2006; Ohmiya 2009; Tian 2015; Walter et  
82 al. 2010). More precisely, bioactive apocarotenoids act as hormones, signaling  
83 compounds, allelopathic substances, chromophores, scent/aroma constituents,  
84 repellents, chemoattractants, growth stimulators and inhibitors. They comprise the  
85 C<sub>20</sub>-vitamin A derivatives (retinal, retinol, and retinoic acid), the C<sub>20</sub>-saffron pigment  
86 crocetin, the C<sub>15</sub>-phytohormone abscisic acid (ABA), strigolactones, volatile (C<sub>9</sub> and  
87 C<sub>13</sub>) and non-volatile degradation products (Dickinson et al. 2019; Finkelstein 2013;  
88 Hou et al. 2016; Walter et al. 2010; Zhang 2018). There are at least two types of  
89 CCOs, the 9-*cis* epoxy-carotenoid dioxygenases (NCEDs) that catalyze the first step  
90 in ABA biosynthesis, and carotenoid cleavage dioxygenases (CCDs) that specifically  
91 oxidize carotenoids at different double bonds leading to metabolites of different sizes  
92 (Huang et al. 2009; Nisar et al. 2015). In plants, apocarotenoids accumulate  
93 particularly in certain plastids (etioplasts, leucoplasts and chromoplasts) and tissues  
94 such as flowers, leaves and roots (Lohse et al. 2005; Strack and Fester 2006).

95 ABA was the first apocarotenoid to be discovered in plants, and the enzymes for  
96 biosynthesis and degradation of ABA are identified and quite well characterized  
97 (Finkelstein 2013). However, in addition to ABA plants biosynthesize many more  
98 apocarotenoids but their mechanisms of action, biochemical modifications,

99 associated enzymes, regulation, and transporters remain elusive (Finkelstein 2013;  
100 Hou et al. 2016). The total number of apocarotenoids and associated bioactivities is  
101 largely unknown but they help fine-tune carotenogenesis, plant development and  
102 environmental responses (Hou et al. 2016; Lätari et al. 2015). There are still  
103 numerous unknown apocarotenoids that function as signaling compounds to control  
104 plant architecture, since blocking carotenoid biosynthesis or eliminating CCDs led to  
105 architectural anomalies (Dickinson et al. 2019; Hou et al. 2016). Furthermore,  
106 changes in apocarotenoid accumulation in response to developmental and  
107 environmental cues demonstrate that some degradation products have regulatory  
108 roles in plants (Avendaño-Vázquez et al. 2014). These recent discoveries of  
109 apocarotenoid bioactivities indicate an untapped potential for plant modification to  
110 meet the needs of agriculture and industry.

111 C<sub>13</sub>-apocarotenoids, also known as norisoprenoids, are 13-carbon butene  
112 cyclohexene degradation products formed by the cleavage of carotenoids  
113 ([Supplemental Figure S1](#)) (Winterhalter and Rouseff 2002). Many of them are volatile  
114 and contribute to the flavor and aroma of flowers and fruits. These volatiles are highly  
115 valued by industry due to their low odor threshold values, and characteristic aroma  
116 notes (e.g.  $\alpha$ -ionone,  $\beta$ -ionone,  $\alpha$ -damascone, and  $\beta$ -damascone (Cataldo et al. 2016;  
117 Rodríguez-Bustamante and Sánchez 2007; Walter and Strack 2011). The biological  
118 functions of norisoprenoids go beyond the frequently discussed attraction of seed  
119 dispersers and pollinators as  $\beta$ -ionone and some other apocarotenoids such as 3-  
120 oxo-7,8-dihydro- $\alpha$ -ionone/ionol show also antimicrobial and antifungal activity (Park  
121 et al. 2004; Walter and Strack 2011). Tobacco plants, infected by blue mold  
122 accumulated  $\beta$ -ionone levels 50–600-fold higher in non-infected stem tissues  
123 adjacent to necrotic lesions (Salt et al. 1986), and many norisoprenoids with hydroxy-  
124 or oxo-functions at C3 position act as plant growth inhibitors and allelochemicals  
125 (D'Abrosca et al. 2004; Dietz and Winterhalter 1996; Kato-Noguchi et al. 2010;  
126 Macías et al. 2008). Blumenol (3-oxo- $\alpha$ -ionol and its glycosides) accumulates upon  
127 arbuscular mycorrhiza (AM) colonization and is probably responsible for systemic  
128 suppression of additional AM colonization (Hou et al. 2016; Wang et al. 2018).  
129 Bioactive apocarotenoids often undergo enzymatic transformations (Mathieu et al.  
130 2009) such as oxidation, reduction, and glycosylation, which modify their biological  
131 activities. Therefore, norisoprenoids occur predominantly in bound forms, i.e.,  
132 glycosylated (Cai et al. 2014; Çaliş et al. 2002; Ito et al. 2000; Ito et al. 2001;

133 Kodama et al. 1981; Neugebauer et al. 1995; Pabst et al. 1992b; Schwab and  
134 Schreier 1990; Tommasi et al. 1996; Wirth et al. 2001). Interestingly, C<sub>13</sub>-  
135 apocarotenoids occur almost exclusively as β-D-glucosides, but the second bound  
136 sugar can be different (Pabst et al. 1992a). Glycosylation of plant metabolites  
137 enhances their stability and water solubility, facilitates their storage and accumulation,  
138 reduces the toxicity of potential toxic agents, and is a key mechanism in the  
139 metabolic homeostasis of plant cells (Bowles et al. 2005).

140 In plants, uridine-diphosphate sugar depending glycosyltransferases (UGTs) catalyze  
141 the production of small molecule glycosides by transferring a carbohydrate from an  
142 activated monosaccharide donor, usually UDP-glucose, to an alcohol, acid, amine, or  
143 thiol (Song et al. 2018; Wang and Hou 2009). Genomes of higher plants have more  
144 than 100 UGTs (Caputi et al. 2012). Plant UGTs acting on small molecules are  
145 mostly members of the carbohydrate active enzyme (CAZy; <http://www.cazy.org>) GT  
146 family 1 (UDP sugar-dependent UGTs) consisting of GT-B fold enzymes (Song et al.  
147 2018). Family 1 UGTs are majorly involved in glycosylation of terpenoids, alkaloids,  
148 cyanohydrins, glucosinolates, flavonoids, and phenylpropanoids (Asada et al. 2013;  
149 Augustin et al. 2012; Bönisch et al. 2014; Bowles et al. 2005). To date, only few  
150 UGTs are known to glycosylate apocarotenoids.

151 Crocin, an apocarotenoid glycosyl ester is produced by the sequential action of  
152 UGT75L6 and UGT94E5 in *Gardenia jasminoides* (Nagatoshi et al. 2012). UGT75L6  
153 glucosylates the carboxyl group of crocetin yielding crocetin glucosyl esters, while  
154 UGT94E5 transfers glucose to the 6' hydroxyl group of the glucose moiety of crocetin  
155 glucosyl esters. UGTCs2 from *Crocus sativus* has glucosylation activity against  
156 crocetin, crocetin β-D-glucosyl ester and crocetin β-D-gentibiosyl ester (Moraga et al.  
157 2004) leading to highly glucosylated crocins (Ahrazem et al. 2015). Only recently, it  
158 was shown that UGT709G1 also from *C. sativus* catalyzes the glucosylation of 3-  
159 hydroxy-β-cyclocitral, making it suited for the biosynthesis of picrocrocins, the  
160 precursor of safranal (Diretto et al. 2019). However, UGTs reacting with C<sub>13</sub>-  
161 apocarotenoids are unknown.

162 *Nicotiana* spp are one of the richest sources of carotenoid degradation products, with  
163 nearly 100 components identified (Bolt et al. 1983; Ito et al. 2000; Takagi et al. 1980;  
164 Wahlberg and Enzell 1987). Although *N. benthamiana* is an indispensable research  
165 model that can be genetically modified efficiently (Goodin et al. 2008), little is known  
166 about the production of apocarotenoids in this plant system and in particular about

167 UGTs transforming small molecules (Jassbi et al. 2017; Sun et al. 2019). Several  
168 draft assemblies of its genome have been generated and a recent database  
169 presented 42,855 putative genes (Kourelis et al. 2018) containing 174 UGT genes  
170 (<http://supfam.org/SUPERFAMILY>). Recently, we isolated ten *UGT* genes from *N.*  
171 *benthamiana* and characterized their encoded proteins (Sun et al. 2019). They  
172 showed promiscuity towards a number of plant metabolites including phenolics and  
173 terpenoids and were further investigated in this work for glucosylation of  
174 apocarotenoids.

175 The genus of mint (*Mentha*, Lamiaceae) includes approximately 25–30 species that  
176 are widely used as medicinal and aromatic herbs. Peppermint (*M. x piperita*) is a  
177 sterile (hexaploid) hybrid created from watermint (*M. aquatica*) and spearmint (*M.*  
178 *spicata*) (Ahkami et al. 2015). An important product of the members of the mint genus  
179 is the essential oil, whose valuable ingredients are menthol and menthone (Croteau  
180 et al. 2005). While the biosynthesis of (–)-menthol and its isomers has been  
181 thoroughly analyzed (Croteau et al. 2005) and UGT products, such as flavone  
182 glycosides (Erenler et al. 2018) and menthol glycoside (Sgorbini et al. 2015) have  
183 been described in *Mentha* species, UGTs have not yet been characterized.  
184 Norisoprenoids have not yet been detected in *Mentha* species. A draft genome  
185 sequence of *M. longifolia*, a diploid species ancestral to cultivated peppermint and  
186 spearmint, is available (Vining et al. 2017).

187 Here, we describe the isolation, identification and characterization of unprecedented  
188 C<sub>13</sub>-apocarotenol UGTs from *N. benthamiana* and *M. x piperita*. The plant species  
189 were selected as potential sources for UGTs because tobacco is a known producer  
190 of allelopathic norisoprenoids (Bolt et al. 1983; D'Abrosca et al. 2004; Ito et al. 2000;  
191 Jassbi et al. 2017; Kodama et al. 1981; Kodama et al. 1984; Mushtaq and Siddiqui  
192 2018). Mint was chosen as second source because related glycosides have been  
193 isolated from mint but no UGT has been characterized in this plant. Recombinant  
194 proteins were screened with the commercially available model C<sub>13</sub>-apocarotenols  $\alpha$ -  
195 and  $\beta$ -ionol, and candidate UGTs were then used to glucosylate hydroxylated  
196 norisoprenoids ([Supplemental Figure S1](#)) produced by P450-mediated  
197 biotransformation. Aglycone libraries identified the natural substrates of C<sub>13</sub>-  
198 apocarotenol UGTs, while agroinfiltration and  $\beta$ -ionol application demonstrated the  
199 importance of substrate availability. Germination tests were performed to compare  
200 the phytotoxic effect of a model norisoprenoid glucoside and its respective aglycone.

201 This knowledge of norisoprenoid UGTs can contribute significantly to the  
202 identification of unknown apocarotenoid signal compounds in plants and the function  
203 of their glucosides during arbuscular mycorrhizal fungi colonization of *Nicotiana* roots  
204 (Wang et al. 2018).

205

## 206 **Results**

### 207 **Selection of candidate UGTs and protein expression**

208 The study was undertaken to identify the first plant UGTs that glucosylate C<sub>13</sub>-  
209 apocarotenoids. UGTs from two plant species (*N. benthamiana* and *M. x piperita*)  
210 were characterized. Since C<sub>13</sub>-apocarotenoid glycosides accumulate in vegetative  
211 tissues (Lätari et al. 2015) and the tobacco plant is a rich source of these  
212 metabolites, we selected ten *UGT* genes (*NbUGT71AJ1*, *NbUGT72AX1*,  
213 *NbUGT72AY1*, *NbUGT72B34*, *NbUGT72B35*, *NbUGT73A24*, *NbUGT73A25*,  
214 *NbUGT85A73*, *NbUGT85A74*, and *NbUGT709Q1*), which were recently isolated from  
215 *N. benthamiana* leaves due to their high transcript levels in vegetative tissues in  
216 comparison with other *UGTs* (Sun et al. 2019). In addition, three full-length *UGT*  
217 gene sequences were found in a *M. x piperita* transcriptome database of the Mint  
218 Genomics Resource at the Washington State University  
219 (<http://langelabtools.wsu.edu/mgr/home>) (Ahkami et al. 2015). They were  
220 successfully cloned from *M. x piperita* and designated *MpUGT86C10*, *MpUGT708M1*,  
221 and *MpUGT709C6*. The UGT identities were assigned by the UGT Nomenclature  
222 Committee ([https://prime.vetmed.wsu.edu/resources/udp-glucuronosyltransferase-](https://prime.vetmed.wsu.edu/resources/udp-glucuronosyltransferase-homepage)  
223 [homepage](https://prime.vetmed.wsu.edu/resources/udp-glucuronosyltransferase-homepage)). The mRNA used to generate the transcriptome database was isolated  
224 from glandular trichomes of *M. x piperita* at two leaf developmental stages. Leaves of  
225 0.5 to 1.5 cm length (top two pairs from the top) were harvested as 'immature leaves'  
226 (Ahkami et al. 2015). The 5th leaf pair from the top constituted 'mature leaves'.  
227 During nucleic acid extraction extra alleles, *MpUGT708M2* and *MpUGT709C7/8* were  
228 obtained. Gene expression analysis of the 13 putative *UGTs* (ten from tobacco and  
229 three from mint) confirmed their significant transcript levels in vegetative tissues  
230 except for *NbUGT71AJ1*, *NbUGT709Q1*, and *NbUGT85A74* (Supplemental Figure  
231 S2). Since C<sub>13</sub>-apocarotenoid glycosides have so far been isolated mainly from plant  
232 leaves, these genes were good candidates to encode for C<sub>13</sub>-apocarotenoid UGTs.  
233 For biochemical characterization of the encoded proteins, the *UGT* genes were  
234 amplified from leaf cDNA of *M. x piperita* and *N. benthamiana*, and cloned into the

235 pGEX-4T-1 expression vector containing an N-terminal glutathione S-transferase  
236 (GST-fusion) tag. The fusion proteins were successfully produced in *E. coli* BL21  
237 (DE3) pLysS, affinity purified and verified by SDS-PAGE ([Supplemental Figure S3](#)).  
238 Clear GST-UGT protein bands were visible at around 80 kDa in all elution fractions,  
239 in addition to a band of about 27 kDa for the free GST protein. Western blot analyses  
240 using anti-GST-antibody confirmed the identity of GST-UGT fusion proteins.

241

#### 242 **Substrate screening with model apocarotenoids and product identification**

243 The recombinant UGTs from *N. benthamiana* and *M. x piperita*, which were produced  
244 in *E. coli*, were subjected to *in vitro* substrate screening. The proteins were incubated  
245 with UDP-glucose as sugar donor and the commercially available model C<sub>13</sub>-  
246 apocarotenols  $\alpha$ - and  $\beta$ -ionol, as well as 3-oxo- $\alpha$ -ionol (kindly provided by Y. Gunata,  
247 Montpellier, France) as acceptors. Only UDP-glucose was used as acceptor  
248 substrate for the screening because apocarotenoids are bound almost exclusively to  
249  $\beta$ -D-glucose and other acceptors are rarely available. Products were analyzed by LC-  
250 MS ([Figure 1](#)). Of the 16 UGTs tested, six and four were able to glucosylate  $\alpha/\beta$ -ionol  
251 and 3-oxo- $\alpha$ -ionol, respectively. The glucosides of  $\alpha$ - and  $\beta$ -ionol were detected in the  
252 ion traces  $m/z$  401 [M+HCOO]<sup>-</sup> and 391 [M+Cl]<sup>-</sup> ([Supplemental Table S1](#)). Similarly,  
253 3-oxo- $\alpha$ -ionyl glucoside was found at  $m/z$  415 [M+HCOO]<sup>-</sup> and 405 [M+Cl]<sup>-</sup>. All  
254 substrates were also incubated with empty vector (control) protein extracts ([Figure 1](#)).  
255 No glucoside was produced in these control samples. The peak shapes imply the  
256 formation of diastereomeric mixtures, in the case of  $\alpha$ -ionyl- and 3-oxo- $\alpha$ -ionyl  
257 glucoside. To confirm the identity of diastereomeric  $\alpha$ -ionyl  $\beta$ -D-glucopyranoside,  
258 recombinant *E. coli* cells expressing MpUGT86C10 were used as whole-cell  
259 biocatalyst for the production of the C<sub>13</sub>-apocarotenyl glucoside according to  
260 (Effenberger et al. 2019). The NMR data confirmed the structure of the product  
261 ([Supplemental Figure S4](#)) and were in accordance with those of (Zeng et al. 2014).  
262 The splitting of the signal for H9/C9 (4.33/72.81 ppm and 4.24/75.45 ppm) in HSQC  
263 proved the presence of a racemate and the H1'/C1' signal (4.15/100.56) showed the  
264 typical chemical shift for  $\beta$ -D-glucosides. The protein sequence analysis of the 16  
265 candidate proteins revealed that the six UGTs that catalyze the glucosylation of C<sub>13</sub>-  
266 apocarotenoids belong to different UGT families (72, 73, 85, 86, and 709) and  
267 contain the characteristic features of functional UGTs ([Supplemental Figures S5 and](#)  
268 [S6](#)). MpUGT86C10 stands out because it is separated from the other sequences.



269 Pairwise amino acid sequence analysis of norisoprenoid UGTs showed only identities  
270 of 22.1 to 36.1%, except for NbUGT73A24 und NbUGT73A25, which exhibited 94.5%  
271 ([Supplemental Table S2](#)). The proteins that glucosylate C<sub>13</sub>-apocarotenols are 476 to  
272 485 amino acids long and contain the characteristic motifs of a functional UGT  
273 including the catalytically active His (position 20 in MpUGT86C10) and Asp (position  
274 130), the plant secondary product glycosyltransferase (PSPG) box (position 350–  
275 393), and the GSS motif (position 456-458; [Supplemental Figure S6](#)) (Sun et al.  
276 2019). Only the six UGTs that glucosylated C<sub>13</sub>-apocarotenoids were further  
277 considered ([Table 1](#)).

278

### 279 **Kinetic analysis of recombinant proteins**

280 First, the reaction conditions were optimized for each enzyme in terms of protein  
281 amount, incubation time, incubation temperature, and pH value ([Supplemental Table](#)  
282 [S3](#)). At least eight different concentrations (10-1,200  $\mu\text{M}$ ) of  $\alpha$ - and  $\beta$ -ionol were used  
283 and the released UDP amounts were quantified to calculate the enzyme activities.  
284 For NbUGT72AY1, NbUGT73A24, NbUGT73A25, MpUGT86C10, and MpUGT709C6,  
285 the  $K_M$ ,  $v_{\text{max}}$ ,  $k_{\text{cat}}$  and  $k_{\text{cat}}/K_M$  values were determined ([Table 2](#)). NbUGT85A73  
286 showed only low activity and kinetic values were not measured. The  $K_M$  values  
287 ranged from 17.4 to 106.0  $\mu\text{M}$  for  $\alpha$ -ionol, and from 6.0 to 131.4  $\mu\text{M}$  for  $\beta$ -ionol.  
288 Similarly,  $k_{\text{cat}}$  values ranged from 0.002 to 0.086  $\text{sec}^{-1}$  for  $\alpha$ -ionol, and 0.007 to 0.208  
289  $\text{sec}^{-1}$  for  $\beta$ -ionol. NbUGT73A25 and MpUGT86C10 showed similar and the highest  
290 enzyme specificity constants of 811 and 786  $\text{M}^{-1} \text{sec}^{-1}$  for  $\alpha$ -ionol, respectively and  
291 1580 and 1575  $\text{M}^{-1} \text{sec}^{-1}$  for  $\beta$ -ionol, respectively.

292

### 293 **Production of hydroxylated C<sub>13</sub>-apocarotenols and their conversion by UGTs**

294 It has recently been shown that bacterial cytochrome P450s, among them the  
295 hydroxylase CYP109E1 from *Bacillus megaterium*, can oxidize various  
296 apocarotenoids (Khatri et al. 2010; Litzenburger and Bernhardt 2016) including  
297 ionones (Putkaradze et al. 2017). Therefore, *B. megaterium* expressing CYP109E1  
298 was used in this study as whole-cell biocatalyst to produce hydroxylated C<sub>13</sub>-  
299 apocarotenoids from  $\alpha$ -, and  $\beta$ -ionol,  $\alpha$ - and  $\beta$ -ionone, and  $\alpha$ -, and  $\beta$ -damascone to  
300 test them as potential substrates for the candidate UGTs as these C<sub>13</sub>-apocarotenols  
301 are not commercially available. The main products of the biotransformation using  
302 CYP109E1 were 3-hydroxy- $\alpha$ -ionol, 4-hydroxy- $\beta$ -ionol, 3-hydroxy- $\alpha$ -ionone, 4-

303 hydroxy- $\beta$ -ionone, 3-hydroxy- $\alpha$ -damascone, and 4-hydroxy- $\beta$ -damascone  
304 (Supplemental Figures S7-S12). Their identities were confirmed by GC-MS analysis  
305 and comparison with reference data (Schoch et al. 1991). The crude mixtures of  
306 hydroxylated apocarotenoid obtained by biotransformations were used directly as a  
307 substrate source for the six norisoprenoid UGTs, and the generated products were  
308 analyzed by LC-MS (Supplemental Figures S7-S12). The peak areas of the UGT  
309 products were determined in the ion traces of their pseudo molecular ions, the  
310 highest value was set to 100% and the relative quantities of the peak areas for the  
311 other UGTs calculated (Table 1). This strategy allows to determine the optimal  
312 enzyme for a substrate, but it does not allow to determine the preferred substrate for  
313 an enzyme due to the different ionizability of the substrates. MpUGT86C10,  
314 NbUGT73A25, NbUGT73A24, and NbUGT72AY1 are efficient C<sub>13</sub>-apocarotenoid  
315 UGTs, although NbUGT73A24 and NbUGT73A25 also transfer glucose to quercetin,  
316 kaempferol, and N-feruloyl tyramine and NbUGT72AY1 can glucosylate scopoletin  
317 (Sun et al. 2019). While MpUGT86C10 preferentially glucosylates norisoprenoids at  
318 the cyclohexene ring, as it is most active with 3-hydroxy- $\alpha$ -ionone, 4-hydroxy- $\beta$ -  
319 ionone, 3-hydroxy- $\alpha$ -damascone, and 4-hydroxy- $\beta$ -damascone, NbUGT73A25  
320 promotes the transfer of glucose to the butene side chain. The latter enzyme prefers  
321  $\alpha$ -ionol,  $\beta$ -ionol, 3-hydroxy- $\alpha$ -ionol, and 4-hydroxy- $\beta$ -ionol as substrate (Table 1).  
322 However, MpUGT86C10 is also able to glucosylate  $\alpha$ - and  $\beta$ -ionol in the side chain  
323 and NbUGT73A25 can modify 4-hydroxy- $\beta$ -ionone and 3-hydroxy- $\alpha$ -damascone at  
324 the hydroxyl group in the cyclohexene ring. NbUGT72AY1 is the most active enzyme  
325 for the glucosylation of 3-oxo- $\alpha$ -ionol (Table 1). Although kinetic data for the  
326 hydroxylated C<sub>13</sub>-apocarotenoids could not be determined due to a lack of purified  
327 reference material these results clearly show that MpUGT86C10 is an efficient UGT  
328 to produce a range of norisoprenoid glucosides.

329

### 330 Identification of natural substrates of MpUGTs and NbUGTs

331 A physiologic aglycone library, which is enriched in naturally occurring aglycones can  
332 be used to reveal the natural substrates of UGTs (Bönisch et al. 2014; Sun et al.  
333 2019). Therefore, small molecule glycosides were isolated by solid phase extraction  
334 from mint leaves and the aglycones were liberated by glycosidase treatment and  
335 analyzed by GC-MS (Figure 2). The aglycone mixture contained the C<sub>13</sub>-  
336 apocarotenols 3-hydroxy- $\alpha$ -damascone, 3-oxo- $\alpha$ -ionol, 3-hydroxy-7,8-dihydro- $\beta$ -ionol,

337 and 3-oxo-7,8-dihydro- $\alpha$ -ionol (Blumenol C), which have not been isolated from mint  
338 plant before, while in the mint glycoside extract the glucosides of these  
339 norisoprenoids could be tentatively identified by LC-MS (Figure 2). The same  
340 glucosides were produced when the aglycone library was used as substrate source  
341 for MpUGT86C10, while no glucoside was generated by the empty vector control  
342 (Figure 2 and Supplemental Figure S13). Therefore, the natural substrates of  
343 MpUGT86C10 in *M. x piperita* appear to be 3-hydroxy- $\alpha$ -damascone, 3-oxo- $\alpha$ -ionol,  
344 3-hydroxy-7,8-dihydro- $\beta$ -ionol and 3-oxo-7,8-dihydro- $\alpha$ -ionol. Similarly, glycosides  
345 were isolated from *N. tabacum* leaves and fractionated into 30 fractions by  
346 preparative LC. *N. tabacum* was used for the isolation of glycosides because tobacco  
347 is readily available in large quantities. The aglycones were liberated in the fractions  
348 using a glycosidase (Sun et al. 2019). 3-Oxo- $\alpha$ -ionol and 3-oxo-7,8-dihydro- $\alpha$ -ionol  
349 (Blumenol C) could be detected by GC-MS in fractions 9-11 (Supplemental Figure  
350 S14), and the corresponding glucosides provisionally detected in the tobacco  
351 fractions by LC-MS. The 3-oxo- $\alpha$ -ionyl glucoside was successfully reconstituted from  
352 the aglycone library by NbUGT72AY1 and confirmed the preference of this enzyme  
353 for 3-oxo- $\alpha$ -ionol already seen in Table 1 (Supplemental Figure S14). Further UGTs  
354 were not tested with the aglycone library.

355

### 356 **Agroinfiltration of *N. benthamiana* for transient expression of C<sub>13</sub>-apocarotenol** 357 **UGT genes and demonstration of UGT *in planta* activity**

358 To investigate the *in planta* function of the norisoprenoid UGTs all UGTs except for  
359 NbUGT85A73, which showed lower activity for the C<sub>13</sub>-apocarotenols, were  
360 transiently overexpressed in *N. benthamiana* leaves using an established viral vector  
361 system (Sun et al. 2019). As controls, an empty vector (CO) was infiltrated and  
362 untreated wild type leaves (WT) were used. *N. benthamiana* leaves were treated with  
363 *Agrobacterium* from abaxial and were harvested 7 and 10 days after agroinfiltration.  
364 During this period, the leaf color changed from green to light yellow (Figure 3). To  
365 test whether the infiltrated genes were successfully expressed in the leaves, RNA  
366 and proteins were extracted to perform qRT-PCR and enzyme activity assays,  
367 respectively. Transcript levels of the infiltrated genes were significantly increased in  
368 the agroinfiltrated leaves in comparison with CO and WT samples (Figure 3). Protein  
369 extracts obtained from UGT72AY1-, UGT73A25-, UGT73A24-, UGT709C6-, and  
370 UGT86C10-infiltrated leaves 7 days post-infiltration were incubated with  $\alpha$ -ionol and

371  $\beta$ -ionol as acceptor substrates and UDP-glucose as donor. All samples produced  
372 glucosides except for *UGT709C6*, WT and CO protein extracts (Figure 3). The  
373 highest level of  $\alpha$ - and  $\beta$ -ionyl glucoside was produced by *UGT73A24* and  
374 *UGT86C10*. Therefore, the infiltrated genes were successfully overexpressed in *N.*  
375 *benthamiana* leaves and contribute to the formation of ionyl glucosides *in vitro*. To  
376 detect changed metabolite levels in agroinfiltrated leaves, we performed targeted LC-  
377 MS analysis with extracts obtained from *UGT72AY1*-, *UGT73A25*-, *UGT73A24*-,  
378 *UGT709C6*-, and *UGT86C10*-leaves and with samples from CO and WT leaves. The  
379 levels of the major *Nicotiana* C<sub>13</sub>-apocarotenyl glucosides, 3-oxo- $\alpha$ -ionyl glucoside  
380 and 3-oxo-7,8-dihydro- $\alpha$ -ionyl glucosides (Cai et al. 2014) were not significantly  
381 increased in the agroinfiltrated leaves in comparison with CO and WT leaves.

382 Due to these ambiguous results, we assumed that limited substrate availability  
383 prevents glucoside formation. Therefore, we decided to demonstrate the C<sub>13</sub>-  
384 apocarotenoid UGT activity of *MpUGT86C10* by agroinfiltration of the corresponding  
385 gene in *N. benthamiana* and concurrent infiltration of  $\alpha$ - and  $\beta$ -ionol to counteract  
386 limited substrate availability. As controls, an empty vector was agroinfiltrated (CO)  
387 and untreated wild type leaves (WT) were used. *N. benthamiana* leaves were  
388 infiltrated with *MpUGT86C10* from abaxial and after 3 days, leaves were dripped with  
389  $\alpha$ - and  $\beta$ -ionol from adaxial using a pipette. All samples were harvested 5 and 7 days  
390 after co-infiltration of the C<sub>13</sub>-apocarotenol substrates. To test whether *MpUGT86C10*  
391 was successfully expressed in the leaves, proteins were extracted and enzyme  
392 activity assays were performed (Supplemental Figures S15-S17). *MpUGT86C10*-  
393 infiltrated samples (Supplemental Figure S17) produced high amounts of ionyl  
394 glucosides in particular  $\alpha$ -ionyl glucoside *in vitro*, while protein extracts from WT and  
395 CO plants yielded only minor quantities. The results indicated that *MpUGT86C10*  
396 was successfully expressed in *N. benthamiana* leaves and catalytically active protein  
397 was produced.

398 To quantify ionyl glucoside concentrations in the co-infiltrated leaves, we also  
399 performed targeted LC-MS analysis of methanolic extracts obtained from  
400 *MpUGT86C10*-infiltrated, CO, and WT leaves and corresponding leaves co-infiltrated  
401 with  $\alpha$ - and  $\beta$ -ionol (Figure 4). Low quantities of  $\alpha$ - and  $\beta$ -ionyl glucoside were found  
402 when WT and CO leaves were infiltrated with the ionols, confirming that *N.*  
403 *benthamiana* plants express endogenous C<sub>13</sub>-apocarotenol UGTs in their leaves. The  
404 level of  $\alpha$ -ionyl glucoside was significantly and that of  $\beta$ -ionyl glucoside slightly

405 increased in the *MpUGT86C10*-infiltrated leaves, which were co-infiltrated with the  
406 ionols in comparison to WT and CO leaves. In addition, we putatively identified 7,8-  
407 dihydro- $\alpha$ - and 7,8-dihydro- $\beta$ -ionyl glucoside (Figure 4) after co-infiltration of  
408 *MpUGT86C10*. The detection of 7,8-dihydro-ionols confirmed the already described  
409 7,8-dehydrogenase activity of C<sub>13</sub>-apocarotenoids in *Nicotiana* (Tang and Suga 1994).  
410 Thus, the result clearly shows that *MpUGT86C10* acts as C<sub>13</sub>-apocarotenol UGT *in*  
411 *planta*.

412

### 413 **C<sub>13</sub>-apocarotenols reduce germination rates and embryo size of *N.*** 414 ***benthamiana* seeds**

415 To further clarify the *in planta* role of C<sub>13</sub>-apocarotenyl glucosides, we carried out a  
416 germination test since norisoprenoid glucosides may have allelopathic activity. *N.*  
417 *benthamiana* seeds were subjected to different concentrations (0.1; 1; 10 and 100  
418 mM) of  $\alpha$ -ionol and  $\alpha$ -ionyl glucoside, respectively (Figure 5). While the seeds  
419 germinated readily at 0.1 and 1 mM  $\alpha$ -ionol, 10 mM and 100 mM of the isoprenoid  
420 reduced the germination rate (68% and 65%, respectively) and the overall embryo  
421 size significantly, and resulted in a lighter leaf color. The effect of  $\alpha$ -ionyl glucoside  
422 was even more pronounced. A 10 mM solution already inhibited the germination,  
423 completely. Consequently, we conclude that  $\alpha$ -ionyl glucoside has a stronger effect  
424 on seed germination and is potentially more phytotoxic than its aglycone  $\alpha$ -ionol.  
425 Although the *Nicotiana*/ionol combination is a model system, the results suggest that  
426 possible biological functions of the glucosides should not be neglected and the thesis  
427 that glycosylation leads to detoxification has no general validity.

428

## 429 **Discussion**

430 Although the production and function of apocarotenoids has attracted much attention  
431 in recent years, their metabolism, including hydroxylation and glycosylation, has  
432 rarely been studied, with the exception of the plant hormone ABA (Finkelstein 2013).

433

### 434 **Identification of unprecedented C<sub>13</sub>-apocarotenol UGTs**

435 Since no C<sub>13</sub>-apocartenol UGT has been biochemically characterized to date, we  
436 used commercially available  $\alpha$ - and  $\beta$ -ionol as model norisoprenoids to screen  
437 tobacco UGTs that were recently characterized (Sun et al. 2019). In addition,  
438 recombinant *M. x piperita* UGTs whose genes were derived from a mint leaf

439 transcriptome database (<http://langelabtools.wsu.edu/mgr/home>), were used as  
440 candidates (Vining et al. 2017). UGTs from mint have not yet been analyzed. We  
441 focused on UGTs strongly expressed in leaves, as vegetative tissue is a rich source  
442 of norisoprenoid glycosides (He et al. 2015; Winterhalter and Rouseff 2002; Wirth et  
443 al. 2001). Out of 16 plant UGTs analyzed in this study (ten from *N. benthamiana* and  
444 6 from *M. x piperita*), six proteins from distinct UGT families (Supplemental Figure S5)  
445 accepted  $\alpha$ - and  $\beta$ -ionol as acceptor substrate, exhibiting apparent  $K_M$  values of 6 to  
446 131  $\mu\text{M}$  (Table 2). In comparison, UGT75L6 from *G. jasminoides*, which forms a  
447 glucose ester showed an apparent  $K_M$  value for the  $\text{C}_{20}$ -apocarotenoid crocetin of  
448 0.46 mM (Nagatoshi et al. 2012), while the apparent  $K_M$  value for the  $\text{C}_{10}$ -  
449 apocarotenoid 3-hydroxy- $\beta$ -cyclocitral of UGT709G1 from *C. sativus* was 64.0  $\mu\text{M}$   
450 (Diretto et al. 2019). UGTs acting on terpenes show  $K_M$  values from 9-463  $\mu\text{M}$  for  
451 monoterpenols such as citronellol, geraniol, nerol and linalool and  $k_{\text{cat}}/K_M$  values  
452 from 40-2600  $\text{M}^{-1} \text{sec}^{-1}$  for the same substrates (Bönisch et al. 2014; Wu et al. 2019).  
453 Since  $\alpha$ - and  $\beta$ -ionol have not yet been found as aglycones in plants, further  
454 hydroxylated  $\text{C}_{13}$ -apocarotenols were synthesized. Therefore, 3-hydroxy- $\alpha$ - and 4-  
455 hydroxy- $\beta$ -ionol, 3-hydroxy- $\alpha$ - and 4-hydroxy- $\beta$ -ionone, as well as 3-hydroxy- $\alpha$ - and  
456 4-hydroxy- $\beta$ -damascone were produced by P450-catalyzed whole cell  
457 biotransformation of  $\alpha/\beta$ -ionols,  $\alpha/\beta$ -ionones, and  $\alpha/\beta$ -damascones. The glycosides of  
458 3-hydroxy- $\alpha$ -ionol and 4-hydroxy- $\beta$ -ionone have been isolated from stinging nettle  
459 (*Urtica dioica* L.) leaves (Neugebauer et al. 1995) and raspberry fruits (*Rubus idaeus*),  
460 (Pabst et al. 1992b) respectively. The reaction products were used as acceptor  
461 substrates for the UGTs and the relative activities calculated (Table 1). UGTs could  
462 be distinguished according to their selectivities towards the glucosylation of the  
463 hydroxyl group attached to the cyclohexene ring (MpUGT86C10) or the butene side  
464 chain (NbUGT73A25). Both types of norisoprenoid glycosides have been isolated  
465 from plant sources, 3-hydroxy- $\alpha$ -ionol 9- $O$ - $\beta$ -D-apiofuranosyl-(1-6)- $\beta$ -D-  
466 glucopyranoside (side chain attachment) and 4-hydroxy- $\beta$ -ionone 4- $O$ - $\alpha$ -L-  
467 arabinofuranosyl-(1-6)- $\beta$ -D-glucopyranoside (ring attachment) from *Cydonia vulgaris*  
468 (Tommasi et al. 1996) and raspberry (Pabst et al. 1992b), respectively. The result  
469 confirmed the validity of our strategy. The peculiarity of MpUGT86C10 is illustrated  
470 by the protein sequence analysis and catalytic specificity. This biocatalyst is  
471 separated from the other sequences in the phylogenetic tree (Supplemental Figure  
472 S5) and shows a preference for ring glucosylation (Table 1). The amino acid

473 sequence analysis does not yet allow identifying the amino acids responsible for this  
474 particular characteristic. Although successful overexpression of the agroinfiltrated  
475 UGT genes in *N. benthamiana* was demonstrated by qPCR and enzyme activity  
476 assays (Figure 3), except for MpUGT709C6, targeted LC-MS analysis of  
477 norisoprenoid glycosides was inconclusive probably due to limited substrate  
478 availability. In other words, there is probably not enough free apocarotenoid available  
479 in the leaves to detect a significant increase in glycoside formation after  
480 agroinfiltration. Therefore,  $\alpha$ -ionol and  $\beta$ -ionol were co-infiltrated after agroinfiltration  
481 (Figure 4). After addition of the ionols, the concentration of their corresponding  
482 glucosides increased significantly in MpUGT86C10-infiltrated leaves proving the C<sub>13</sub>-  
483 apocarotenol UGT activity of MpUGT86C10 but also revealing endogenous  $\alpha$ -ionol  
484 and  $\beta$ -ionol UGT activity in *N. benthamiana* leaves. The putative identification of the  
485 hexosides of 7,8-dihydro- $\alpha$ -ionol and 7,8-dihydro- $\beta$ -ionol is supported by the  
486 detection of a 7,8-dehydrogenase in *N. tabacum* (Tang and Suga 1994). Studies on  
487 gene function analysis using agroinfiltration of candidate genes in combination with  
488 metabolite analysis always have to reckon with limited substrate availability, which is  
489 a major disadvantage of this strategy.

490

#### 491 **C<sub>13</sub>-apocarotenoid UGTs are promiscuous biocatalysts with different functions**

492 UGTs of five different classes (72, 73, 85, 86, and 709) were able to transfer a sugar  
493 molecule onto C<sub>13</sub>-apocarotenoids. The enzymes NbUGT72AY1, NbUGT73A24,  
494 NbUGT73A25, and NbUGT85A73 have recently been shown to be promiscuous  
495 enzymes. They glucosylated 18, 17, 17, and 19 small molecules out of a selection of  
496 27 different metabolites, which were known to occur naturally in *Nicotiana* species  
497 including scopoletin, benzyl alcohol, 2-phenylethanol, kaempferol, and 3-cis-hexenol,  
498 and structurally related aliphatic, branched chain, and phenolic metabolites (Sun et al.  
499 2019).

500 Further studies demonstrated that members of the UGT72 family glucosylate  
501 flavonols (Yin et al. 2017), flavanones, anthocyanins (Zhao et al. 2017), and  
502 monolignols (Lanot et al. 2008) and are most probably involved in lignin biosynthesis  
503 (Wang et al. 2012). UGT73 family members catalyze the 3-O-glucosylation of the  
504 sapogenins oleanolic acid and hederagenin (Augustin et al. 2012; Erthmann et al.  
505 2018) as well as the conversion of brassinosteroid phytohormones (Poppenberger et  
506 al. 2005). UGT73 enzymes are also responsible for the 7-O-glucosylation of

507 kaempferol and quercetin 3-O-rhamnoside (Jones et al. 2003), the transformation of  
508 salicylic acid and scopoletin (Simon et al. 2014) as well as feruloyl tyramine (Sun et  
509 al. 2019). Therefore, UGT72 and 73 members from *N. benthamiana* show broad  
510 substrate tolerance and use phenolic compounds, including flavonols, but also  
511 aliphatic alcohols such as terpenoids as acceptor molecules.

512 UGT85A73 is probably implicated in the glucosylation of tobacco flower volatiles as it  
513 is strongly expressed in tobacco blossom and glucosylates nonpolar, low-molecular-  
514 weight compounds (Caputi et al. 2012; Sun et al. 2019). UGT85s from peach, grape,  
515 tea plant, and kiwifruit catalyze the glucosylation of aliphatic alcohols including  
516 linalool, geraniol, citronellol, hexanol, (Z)-3-hexenol, octanol and also volatiles such  
517 as 2-phenylethanol, benzyl alcohol, and furaneol (Bönisch et al. 2014; Jing et al.  
518 2019; Song et al. 2018; Wu et al. 2019).

519 The related UGT709C2 protein shows catalytic activity towards 7-deoxyloganetate, a  
520 precursor of loganin and secologanin (Asada et al. 2013). Interestingly, UGT709G1  
521 has only recently been identified as a novel C<sub>10</sub>-apocarotenoid UGT from saffron (*C.*  
522 *sativus*) that produces picrocrocin, the precursor of safranal from 3-hydroxy- $\beta$ -  
523 cyclocitral (Diretto et al. 2019). Strikingly, picrocrocin was found in *N. benthamiana*  
524 when 3-hydroxy- $\beta$ -cyclocitral was provided by CCD2, indicating apocarotenoid UGT  
525 activity in tobacco (Diretto et al. 2019). Although UGT86C4 (Bhat et al. 2013),  
526 UGT86C1 (Ono et al. 2006), and UGT86C3 (Noguchi et al. 2008) have been isolated  
527 from different plants, no biochemical analyses have been performed to date.

528

### 529 **Aglycone libraries are versatile tools for enzyme function analysis**

530 Physiologic libraries of aglycones have proven to be versatile tools for identifying  
531 natural acceptor substrates of UGTs especially if potential metabolites are not  
532 commercially available (Bönisch et al. 2014). The broad substrate compatibility of  
533 UGTs requires a broad spectrum of potential aglycones to be tested, which is often  
534 hindered by a biased collection of acceptor molecules. This difficulty has recently  
535 been alleviated by the use of aglycone libraries to identify *in planta* substrates  
536 (Bönisch et al. 2014). The powerful tool was used to identify unknown substrates of  
537 recombinant plant UGTs. Aglycone libraries were easily prepared by isolation and  
538 subsequent glycosidase treatment of glycoconjugates. The natural glycosides were  
539 then reconstituted by enzyme activity assays. This approach allowed the  
540 identification of UDP-glucose:monoterpenol UGTs from grapevine (Bönisch et al.



541 2014) and two feruloyl tyramine UGTs from *N. benthamina* (Sun et al. 2019) and  
542 identified kaempferol, quercetin, abscisic acid and three unknown natural metabolites  
543 as putative *in planta* substrates of UGT71 family members (Song et al. 2015). In this  
544 study, a collection of aglycones liberated from glycosides isolated from *M. x piperita*  
545 and *N. benthamiana* enabled the characterization of the first C<sub>13</sub>-apocarotenoid  
546 UGTs (Figure 2 and Supplemental Figures S13 and S14). MpUGT86C10 readily  
547 glucosylated 3-hydroxy- $\alpha$ -damascone, 3-oxo- $\alpha$ -ionol, 3-oxo-7,8-dihydro- $\alpha$ -ionol, and  
548 3-hydroxy-7,8-dihydro- $\beta$ -ionol (Blumenol C), metabolites previously unknown in mint.  
549 We assume that other members of the UGT86 family, of which no enzyme has yet  
550 been biochemically characterized, are also able to glucosylate apocarotenoids. The  
551 norisoprenoids found in mint have frequently been detected in different plant tissues  
552 (Winterhalter and Rouseff 2002) and are produced by cell suspension cultures of *V.*  
553 *vinifera* from  $\beta$ -ionone and dehydrovomifoliol (Mathieu et al. 2009). Studies with  
554 carotenoid hydroxylase mutants suggested that C<sub>13</sub>-apocarotenoids derive from  
555 xanthophylls rather than through secondary oxygenation of  $\alpha$ - and  $\beta$ -ionone (Lätari et  
556 al. 2015; Mathieu et al. 2009). However, reduction of the 7,8 double bond appears to  
557 take place after the formation of the C<sub>13</sub>-structure (Tang and Suga 1994), which was  
558 also confirmed by our results. Some fruits and flowers contain high amounts and a  
559 high diversity of apocarotenoid glycosides (Winterhalter and Rouseff 2002), which  
560 indicates increased xanthophyll degradation during ripening or senescence of the  
561 fruits and changes in the use of xanthophyll precursors and secondary modifications  
562 (Lätari et al. 2015).

563

#### 564 **Possible biological functions of C<sub>13</sub>-apocarotenoid UGTs**

565 Lately, carotenoid and apocarotenoid metabolism in *Arabidopsis thaliana* was  
566 investigated in response to enhanced carotenoid production upon phytoene synthase  
567 overexpression (Lätari et al. 2015; Zhou et al. 2015). Although overexpression of the  
568 carotenoid biosynthesis gene led to a dramatic accumulation of mainly  $\beta$ -carotene in  
569 non-green tissues, carotenoid levels remained unchanged in leaves. In green tissues,  
570 the increased pathway flux was compensated by generation of a high level of C<sub>13</sub>-  
571 apocarotenoid glycosides, including 3-oxo- $\alpha$ -ionyl, 3-hydroxy-5,6,-epoxy- $\beta$ -ionone,  
572 and 6-hydroxy-3-oxo- $\alpha$ -ionone glycoside (Lätari et al. 2015). In contrast to leaves,  
573 apocarotenoid glycosides were absent in the roots.

574 Similarly, green tissues of phytoene synthase-overexpressing tomato and *N.*  
575 *tabacum* plants also showed only slightly increased carotenoid concentrations  
576 compared with wild-type plants (Busch et al. 2002; Fray et al. 1995). The authors  
577 proposed that tissue-specific capacities to synthesize xanthophylls determine the  
578 modes of carotenoid accumulation and apocarotenoid generation. The multiple  
579 functions of carotenoids and apocarotenoids such as ABA require regulation of their  
580 synthesis and the production, release, transformation and disposal of their  
581 breakdown products. Similarly, glycosylation of apocarotenoids catalyzed by  
582 NbUGT72AY1, NbUGT73A24, NbUGT73A25, and MpUGT86C10 may function as a  
583 valve adjusting carotenoid and apocarotenoid steady-state levels in leaves.

584 One of the functions of glycosylation is the detoxification of metabolites through  
585 increased solubility to enable cell transport and vacuolar sequestration (Song et al.  
586 2018). Electrophilic  $\alpha,\beta$ -unsaturated carbonyls can cause various detrimental effects  
587 due to interactions with proteins, and these functional chemical groups are frequently  
588 found in carotenoid degradation products. In order to be prepared for the  
589 detoxification of different metabolites, it is advisable to be able to glucosylate a wide  
590 range of alcohols. Therefore, apocarotenol UGTs show substrate promiscuity similar  
591 to other UGTs of the secondary metabolism (Song et al. 2018). The C<sub>13</sub>-  
592 apocarotenoid glycosides also perform vital functions in plants since crosses of  
593 *phytoene synthase* overexpressing lines with *carotenoid cleavage dioxygenase*  
594 deficient mutants produced lethal seedlings suggesting deleterious effects at high  
595 fluxes into the carotenoid pathway when the detoxification mechanism into  
596 apocarotenoid glycosides is dysfunctional (Lätari et al. 2015). Therefore, we propose  
597 a biosynthetic pathway for the production of 3-hydroxy-7,8-dihydro- $\beta$ -ionyl-, 3-oxo- $\alpha$ -  
598 ionyl-, and 3-oxo-7,8-dihydro- $\alpha$ -ionyl glucoside in *M. x piperita* and *N. benthamiana*  
599 (Figure 6) in accordance to a published scheme for *A. thaliana* (Lätari et al. 2015).

600

### 601 **C<sub>13</sub>-apocarotenol glucosides could act as allelochemicals and are biomarkers** 602 **for colonization with arbuscular mycorrhizal fungi**

603 Numerous allelochemicals have been isolated from a variety of plant species. They  
604 comprise different chemical families including phenolics, terpenoids, alkaloids, and  
605 other nitrogen-containing chemicals (Kong et al. 2019). Allelochemicals are released  
606 into the environment and are important in regulating the interaction between plants  
607 and other organisms. Since C<sub>13</sub>-apocarotenoids inhibit seed germination and impair

608 root and shoot growth at concentrations as low as 1 mM (D'Abrosca et al. 2004;  
609 Kato-Noguchi et al. 2010; Kobayashi and Kato-Noguchi 2015) we studied the effect  
610 of glucosylation on the allelopathic activity of the model norisoprenoid  $\alpha$ -ionol. The  
611 concentrations required for 50% growth inhibition on root and shoot growth of  
612 different plant species were 2.7–19.7  $\mu$ M for 3-hydroxy- $\beta$ -ionone, and 2.1–34.5  $\mu$ M  
613 for 3-oxo- $\alpha$ -ionol (Kato-Noguchi et al. 2010). In a germination test, we could show  
614 that glucosylated  $\alpha$ -ionol had an even more drastic negative effect on germination  
615 rate and embryo size compared to unbound  $\alpha$ -ionol, which showed much weaker  
616 allelopathic activity than 3-hydroxy- $\beta$ -ionone and 3-oxo- $\alpha$ -ionol (Figure 5). Although  
617 C<sub>13</sub>-apocarotenyl glucosides have often been identified together with their allelopathic  
618 aglycones in plants, nothing is known about the phytotoxic potential of the glucosides.  
619 (Dietz and Winterhalter 1996; Llanos et al. 2010). Our results show that glucosylation  
620 does not always imply detoxification and consequently a reduction of the phytotoxic  
621 effect of the aglycones, but can also enhance it. Similarly, saponins (steroid  
622 glucosides) are more phytotoxic than their aglycones where the allelopathic activity is  
623 attributed to their surfactant character (Ghimire et al. 2019; Mushtaq and Siddiqui  
624 2018). In addition, phytotoxic iridoid glucosides and flavonoid glycosides were found  
625 in roots of *Vesbascum thapsus* (Pardo et al. 1998) and leaves of *Myrcia tomentosa*  
626 (Imatomi et al. 2013), respectively.

627 Glycosylation is thought to be a prerequisite for the transport of secondary  
628 metabolites in plants (Yazaki et al. 2008) and therefore might also facilitate exudation  
629 of the allelochemicals by roots (Weston et al. 2012). Glycosylation increases the  
630 mobility of plant metabolites in soil as was shown for flavone O-glycosides isolated  
631 from allelopathic rice seedlings (Kong et al. 2007).

632 Only recently, C<sub>13</sub>-apocarotenyl glucosides (11-hydroxyblumenol C-9-O-, and 11-  
633 carboxyblumenol C-9-O-glucoside) have been proposed as shoot markers of root  
634 symbiosis with arbuscular mycorrhizal fungi (AMF) (Wang et al. 2018). Blumenol-(3-  
635 oxo- $\alpha$ -ionol derivatives)-type metabolites accumulate in roots of different plants after  
636 AMF inoculation and their concentration is highly correlated with the fungal  
637 colonization rate (Strack and Fester 2006). Glycosylation of the blumenols usually  
638 occurs at the hydroxyl group at the C9 position (side chain). The glycosyl moiety can  
639 be a monosaccharide or combinations of different sugars (Wang et al. 2018). The  
640 type of decorations is highly species-specific. Some of these glucosides are formed  
641 in the roots and transported to the shoots (Wang et al. 2018). Future studies should

642 analyse whether MpUGT86A10 related UGTs are involved in the glucosylation of  
643 blumenols, which are formed when plant roots are colonized by AMF. *N.*  
644 *benthamiana* and *M. x piperita* root tissue show high expression levels of the C<sub>13</sub>-  
645 apocartenol UGT genes in comparison to other UGTs ([Supplemental Figure S2](#)).

646 In this study, unprecedented C<sub>13</sub>-apocarotenol UGTs were characterized, natural  
647 substrates of UGT86 class members were identified, and the versatility of aglycone  
648 libraries to reveal *in planta* substrates was demonstrated. In the future, the results will  
649 shed more light on the importance of apocarotenoid glycosides in plants, animals and  
650 human, and will enable further studies to investigate their role as signalling  
651 substances.

652

## 653 **Materials and Methods**

### 654 **Chemicals and plant materials**

655 Chemicals and solvents were purchased from Sigma (Steinheim, Germany), Aldrich  
656 (Steinheim, Germany), Roth (Karlsruhe, Germany), and Fluka (München, Germany).  
657 Uridine 5-diphosphate (UDP), UDP-glucose,  $\alpha$ -ionol and  $\beta$ -ionol ( $\geq 90\%$ ) were  
658 purchased in analytical grade from Sigma-Aldrich. Peppermint (*M. x piperita*) and  
659 tobacco plants (*N. benthamiana*) used for the isolation of the UGT genes were  
660 cultured at room temperature in a growth chamber maintained at  $22 \pm 2$  °C with a 16  
661 h light, 8 h dark photoperiod and a light intensity of  $70 \pm 10$   $\mu\text{mol m}^{-2} \text{sec}^{-1}$ ,  
662 respectively. For over-expression and molecular analyses, tobacco leaves were  
663 injected with viral vectors (Sun et al. 2019) and harvested 7 and 10 days after  
664 agroinfiltration.

665

### 666 **Selection of UGTs – UGTs from *Mentha x piperita***

667 To find putative UGTs in *M. x piperita* (*MpUGTs*), a database search was performed  
668 using the transcriptome data from the Mint Genomics Resource (MGR) at  
669 Washington State University (<http://langelabtools.wsu.edu/mgr/home>) since the draft  
670 genome sequence was not yet available. Three full-length putative *MpUGT*  
671 nucleotide sequences were assembled based on overlapping expressed sequence  
672 tags. The genes were designated *MpUGT86C10*, *MpUGT708M1*, and *MpUGT709C6*  
673 (<https://prime.vetmed.wsu.edu/resources/udp-glucuronyltransferase-homepage>).

674 The allelic forms *MpUGT708M2* and *MpUGT709C7/8* were obtained during the  
675 isolation of *MpUGT708M1* and *MpUGT709C6*, respectively.

676

### 677 **Selection of UGTs – UGTs from *Nicotiana benthamina***

678 Ten UGTs were recently isolated from *N. benthamina* (NbUGTs) and designated  
679 *UGT71AJ1*, *UGT72AX1*, *UGT72AY1*, *UGT72B34*, *UGT72B35*, *UGT73A24*,  
680 *UGT73A25*, *UGT85A73*, *UGT85A74*, and *UGT709Q1* (Sun et al. 2019). Nucleotide  
681 and amino acid sequence analyses were performed with the Geneious Pro 5.5.6  
682 software (Biomatters, <http://www.geneious.com/>).

683

### 684 **Determination of gene expression levels and cloning of plasmid constructs**

685 Total RNAs were isolated from *M. x piperita* and *N. benthamiana* leaves using the  
686 Rneasy plant mini kit (Qiagen, Hilden, Germany) and CTAB extraction, respectively  
687 (Sun et al. 2019), followed by DNase I (Fermentas, St. Leon-Rot, Germany)  
688 treatment and reverse transcription to prepare cDNA. The transcribed cDNA was  
689 used as template for the PCR reactions, which were carried out in a 30 µl total  
690 reaction volume. The program was 2 min at 98 °C, one cycle; denaturation 30 sec at  
691 98 °C, annealing 30 sec at 55 °C, elongation 1 min at 72 °C, 35 cycles; extension 10  
692 min at 72 °C, one cycle, final temperature 8 °C, using appropriate primers  
693 ([Supplemental Table S4](#)). After gel extraction of the DNA fragments with the PCR  
694 Clean-up Gel Extraction Kit (Macherey-Nagel, Düren, Germany), the DNA fragments  
695 and the vector DNA were digested by the same restriction enzymes ([Supplemental](#)  
696 [Table S4](#)) and were ligated into pGEX-4T-1 vector. The recombinant plasmids  
697 (pGEX-4T1-UGTs) were transformed into *E. coli* NEB 10 beta. After colony PCR and  
698 restriction enzyme digestion analysis, the positive plasmids were sequenced and  
699 stored as cryostock cultures at –80 °C.

700

### 701 **Heterologous protein expression**

702 Protein expression was performed with *E. coli* BL21 (DE3) pLysS containing the  
703 pGEX-4T-1 vector and the UGT sequences according to (Sun et al. 2019).  
704 Recombinant proteins were analyzed by SDS-PAGE stained with Coomassie brilliant  
705 blue R-250 (Supporting figures: Figure S3) and Western blot using anti-GST antibody  
706 and goat anti-mouse IgG fused to alkaline phosphatase. Proteins were quantified by  
707 Bradford assay.

708

### 709 **Substrate screening by LC-MS**

710 To identify functional C<sub>13</sub>-apocarotenol UGTs, the recombinant proteins were  
711 assayed with the model norisoprenoids  $\alpha$ - and  $\beta$ -ionol, and the reference material 3-  
712 oxo- $\alpha$ -ionol, which was kindly provided by Ziya Y. Gunata, INRA, Montpellier, France.  
713 In addition, 3-hydroxy- $\alpha$ -ionol, 4-hydroxy- $\beta$ -ionol, 3-hydroxy- $\alpha$ -ionone, 4-hydroxy- $\beta$ -  
714 ionone, 3-hydroxy- $\alpha$ -damascone and 4-hydroxy- $\beta$ -damascone were tested, which  
715 were produced by P450-catalyzed biotransformation using *Bacillus megaterium*  
716 (Putkaradze et al. 2017). For the substrate screening, 50  $\mu$ l crude protein extract, 100  
717 mM Tris-HCl buffer (pH 7.5), 600  $\mu$ M substrate (dissolved in DMSO) and 1 mM UDP-  
718 glucose were added to a 200  $\mu$ l standard assay. The reaction was initiated by the  
719 addition of UDP-glucose, incubated with constant shaking at 400 rpm and 30 °C for  
720 17 hours in darkness. The reaction was stopped by heating 10 min at 75 °C. The  
721 samples were centrifuged (14,800 rpm) at room temperature for 10 min twice to  
722 separate the precipitated protein from the soluble products. Fifty  $\mu$ l of the clear  
723 supernatant was analysed by LC-MS and products were monitored using diagnostic  
724 ions ([Supplemental Table S1](#)). Samples were analyzed with an Agilent 1100 LC/UV  
725 system (Agilent Technologies, Waldbronn, Germany) equipped with a reverse-phase  
726 column (Luna 3u C18 100A, 150 x 2 mm; Phenomenex) and connected to an Agilent  
727 6340 ion-trap mass spectrometer (Agilent Technologies). A binary gradient consisting  
728 of solvent A (water with 0.1% formic acid) and B (methanol with 0.1% formic acid)  
729 was performed. The gradient went from 0–3 min 100% A to 50% A; 3–6 min 50% A  
730 to 100% B; 6–14 min hold 100% B; 14–14.1 min 100% B to 100% A; 14.1–25 min  
731 hold 100% A. The flow rate was 0.2 ml min<sup>-1</sup> and UV was recorded at 280 nm. MS  
732 spectra were acquired in alternating polarity mode and nitrogen was used as  
733 nebulizer gas at 30 p.s.i. and as dry gas at 330 °C and 9 L min<sup>-1</sup>. Data were analyzed  
734 with Data Analysis 5.1 software (Bruker Daltonics, Bremen, Germany).

735

### 736 **Production of hydroxylated C<sub>13</sub>-apocarotenols**

737 For the large-scale production of hydroxylated norisoprenoids, a CYP109E1 based *B.*  
738 *megaterium* whole-cell system was applied (Putkaradze et al. 2017). C<sub>13</sub>-  
739 apocarotenoid ( $\alpha$ - or  $\beta$ -ionol,  $\alpha$ - or  $\beta$ -ionone,  $\alpha$ - or  $\beta$ -damascone) was added to the  
740 cell-suspension with a final concentration of 40 mg L<sup>-1</sup>. After 4 h of incubation at  
741 30 °C and 150 rpm, when norisoprenoids were almost completely converted into  
742 hydroxyl-products, whole-cell reactions were quenched and extracted with a double  
743 volume of ethyl acetate. The organic phase was dried using a rotary evaporator.

744

### 745 **Determination of kinetic constants by UDP Glo™ assay**

746 To determine the enzyme kinetics, the reaction conditions were optimized for each  
747 UGT. In order to find the optimal protein amount, 0.5 to 4 µg of UGT709C6,  
748 UGT86C10 and UGT73A25; 0.25 to 4 µg of UGT73A24; and 0.5 to 6 µg of  
749 UGT72AY1 was examined. The pH optima were determined from pH 4.0 to pH 11.5  
750 using citric acid buffer (50 mM, pH 4.0 to 6.0), sodium phosphate buffer (50 mM, pH  
751 6.0 to 8.0) and Tris-HCl (50 mM, pH 7.5 to 11.5). The optimal temperature was  
752 evaluated from 15 to 60 °C in 5 °C-unit intervals. Enzyme kinetics were determined  
753 with the UDP-Glo™ assay (Promega, Mannheim, Germany) according to the  
754 manufacturer's instructions using the optimal reaction conditions for each UGT. The  
755 reaction mixture (100 µl) contained 50 mM optimal buffer, 100 µM UDP-glucose, a  
756 final concentration of 10 to 1200 µM substrate (dissolved in DMSO), and optimal  
757 concentration of purified protein. For the blank reaction, DMSO was added instead of  
758 the substrate solution. Triplicate analyses were performed. The luminescence was  
759 measured with a CLARIOstar Microplate-reader (BMG Labtech, Ortenberg, Germany)  
760 and the kinetic constants were calculated by non-linear regression of the obtained  
761 enzyme activity employing the Microsoft Excel Solver.

762

### 763 **α-Ionyl β-D-glucopyranoside production by whole cell biotransformation**

764 Whole cell biotransformation was performed according to the procedure in  
765 (Effenberger et al. 2019) using *MpUGT86C10*-pGEX-4T1 for the production of α-ionyl  
766 β-D-glucopyranoside, except that a 5-L-bioreactor was used. Bacteria were grown at  
767 37 °C in M9 minimal medium to an OD<sub>600</sub> of 1.5. The culture was fed daily with 1%  
768 sucrose and 100 µL L<sup>-1</sup> of α-ionol. The yield of α-ionyl glucoside in the supernatant at  
769 7 days after IPTG induction was 0.38 g/L. The glucoside produced by the whole-cell  
770 biocatalyst could be readily purified by solid phase extraction from the supernatant of  
771 the culture. After distillation and ethyl acetate extraction, the colored impurities were  
772 removed by activated carbon treatment (Effenberger et al. 2019). LC-MS and NMR  
773 analyses confirmed purity and identity, respectively ([Supplemental Figure S4](#)).

774

### 775 **NMR spectroscopy of α-ionyl glucoside**

776 Thirty mg of pure α-ionyl glucoside was dissolved in 600 µl DMSO-D<sub>6</sub> (99.96%)  
777 containing 0.03% (v/v) trimethylsilane (TMS, Sigma-Aldrich, Steinheim, Germany).

778 NMR spectra were recorded with a Bruker MHz Avance III spectrometer (Bruker,  
779 Rheinstetten, Germany). A combination of COSY (correlation spectroscopy), HSQC  
780 (heteronuclear single quantum coherence), HMBC (heteronuclear multiple-bond  
781 correlation),  $^1\text{H}$ , and  $^{13}\text{C}$  experiments were used for structure elucidation. The  $^1\text{H}$   
782 NMR and  $^{13}\text{C}$  NMR spectra were recorded at 400.133 MHz and 100.624 MHz,  
783 respectively. The chemical shifts were referred to the solvent signal and TMS. The  
784 spectra were acquired and processed with MestReNova software  
785 (<https://mestrelab.com/>).

786

### 787 **Agroinfiltration of UGTs into *N. benthamiana* leaves**

788 Agroinfiltration was performed according to (Sun et al. 2019) using a viral vector  
789 system to deliver the various modules into plant cells. The full-length open reading  
790 frames (ORF) of *UGT709C6*, *UGT86C10*, *UGT72AY1*, *UGT73A24* and *UGT73A25*  
791 were amplified by PCR from plasmid pGEX-4T1-UGTs using the primers listed in  
792 [Supplemental Table S4](#). The PCR products were double digested with restriction  
793 enzymes ([Supplemental Table S4](#)), and ligated into pICH11599 vectors, according to  
794 (Sun et al. 2019) to yield pICH11599-UGTs. The recombinant genes were subjected  
795 to sequencing to confirm the sequence of the inserts. *Agrobacterium* strains carrying  
796 pICH17388, pICH14011 and pICH11599-UGTs were mixed and infiltrated into *N.*  
797 *benthamiana* leaves. An empty pICH11599 vector was infiltrated and served as  
798 negative control. The infiltrated plants grew under the same conditions. Leaves were  
799 sampled 7 and 10 days after infiltration. Proteins were extracted from infiltrated  
800 leaves and analyzed for enzyme activity by LC-MS according to (Sun et al. 2019).

801

### 802 **Verification of UGT overexpression by quantitative real-time PCR analysis**

803 Quantitative real-time PCR (qRT-PCR) analysis was performed on *N. benthamiana*  
804 leaves 7 d (NbUGTs) and 10 d (MpUGTs) after agroinfiltration according to (Sun et al.  
805 2019). Actin was used as internal control for normalization ([Supplemental Table S4](#)).  
806 The reaction was run on a StepOnePlus™ system (Applied Biosystems™ Waltham,  
807 MA, USA). Subsequently, 2% agarose gel electrophoresis was applied to confirm that  
808 the desired amplicons had been generated, and the relative expression level was  
809 analyzed by applying a modified  $2^{-\Delta\Delta\text{-Ct}}$  method taking reference genes and gene  
810 specific amplification efficiencies into account (Sun et al. 2019).

811



## 812 **Aglycone library generation**

813 To identify natural apocarotenoid substrates of the UGTs, aglycone libraries were  
814 prepared from tobacco leaves as described by (Sun et al. 2019) and from  
815 *M. x piperita* leaves. One hundred and eighty g mint leaves were homogenized in  
816 500 ml water, subjected to XAD2 (237 g) solid phase extraction and glycosides were  
817 eluted with 50 ml methanol. Methanol was removed by rotary evaporation, the  
818 residue dissolved in 10 ml water, and 10 ml citrate/phosphate buffer (pH 4.3)  
819 containing 1.6 g of the glycosidase Rapidase 2000 (DSM, Düsseldorf, Germany) was  
820 added. Hydrolysis was performed at room temperature, overnight. Aglycones were  
821 extracted with 20 ml ethyl acetate, concentrated to 1 ml (aglycone library) and  
822 analyzed by GC-MS according to (Huang et al. 2009; Schmidt et al. 2006). The  
823 library also served as substrate in enzyme assays with MpUGT86C10 and an empty  
824 vector control. To avoid loss of volatiles extracts were carefully concentrated by  
825 using a Vigreux column.

826

## 827 **Co-infiltration of Agrobacterium and acceptor substrates**

828 *N. benthamiana* (8 weeks old) leaves were agroinfiltrated with *MpUGT86C10* and  
829 pICH11599 (empty vector), respectively as described before. The model  
830 apocarotenoid substrates  $\alpha$ -ionol and  $\beta$ -ionol were dissolved in DMSO (8.3%) and  
831 dropped (100  $\mu$ L in total) adaxial onto *N. benthamiana* leaves using a pipette within 5  
832 min, 3 days after agroinfiltration. Wild type leaves and leaves agroinfiltrated with an  
833 empty vector control were also treated with the same apocarotenoid substrates.  
834 Leaves were collected 5 and 7 days after substrate infiltration. Proteins were  
835 extracted from infiltrated leaves for the analysis of enzyme activity and metabolites  
836 were extracted for the identification of glucoside products by LC-MS.

837

## 838 **Germination test using *N. benthamiana* seeds**

839 *N. benthamiana* seeds were washed with 75% ethanol, 3.5% NaClO and H<sub>2</sub>O, before  
840 being placed on a wetted filter paper to germinate at room temperature and a 16 h  
841 light, 8 h dark photoperiod. To determine the effect of C<sub>13</sub>-apocarotenoids on seed  
842 germination, a 1.5 ml solution of  $\alpha$ -ionol and  $\alpha$ -ionyl glucoside (0.1; 1; 10 and 100 mM,  
843 respectively) in 1% DMSO were tested. Twenty seeds per treatment were used.  
844 Experiment was conducted in triplicate. After two weeks of incubation time, the  
845 germination rates and embryo sizes were measured.

846

847 **Accession numbers**

848 NbUGT72AY1, Nbv6.1trP2283; NbUGT73A24, Nb6.1trP32845; NbUGT73A25,  
849 Nb6.1trP48287; NbUGT85A73, Nb6.1trP20189.

850

851 **Acknowledgements.** We are thankful to Michael Strebl, Maximilian Merz, and  
852 Isabelle Effenberger for their technical support. Thanks to Alexander Christmann for  
853 providing tobacco plants. The authors declare no competing interests.

854

855 **Funding**

856 We thank the China Scholarship Council (CSC) (no. 201506060185), International  
857 Graduate School of Science and Engineering (IGSSE) (no. 10.05) and Deutsche  
858 Forschungsgemeinschaft DFG SCHW 634/32-1 for funding.

859

860 The data that support the findings of this study are available from the corresponding  
861 author upon reasonable request.

862

863 Short legends for Supplemental Figures and Tables

864 **Figure S1.** Chemical structures of selected C<sub>13</sub>-apocarotenoids (norisoprenoids)

865 isolated from plants.

866 **Figure S2.** Relative expression levels of *UGTs* in different tissues of *N. benthamiana*  
867 and *M. x piperita*.

868 Figure S3. SDS-PAGE analysis of six *UGTs*.

869 **Figure S4.** Heteronuclear Single Quantum Correlation (HSQC) Nuclear Magnetic  
870 Resonance (NMR) spectroscopy of enzymatically synthesized  $\alpha$ -ionyl  $\beta$ -D-  
871 glucopyranoside.

872 **Figure S5.** Phylogenetic tree of the analyzed *UGTs* from *N. benthamiana* and *M. x*  
873 *piperita*.

874 Figure S6. Amino acid sequence alignment of selected *UGTs* from *M. x piperita* and  
875 *N. benthamiana* that glucosylated C<sub>13</sub>-apocarotenols.

876 **Figure S7.** GC-MS of apocarotenoids formed by P450-mediated biotransformation of  
877  $\alpha$ -ionol to produce 3-hydroxy- $\alpha$ -ionol and LC-MS analysis to detect 3-hydroxy- $\alpha$ -ionyl  
878 glucoside produced by *UGTs*.

879 **Figure S8.** GC-MS of apocarotenoids formed by P450-mediated biotransformation of  
880  $\beta$ -ionol to produce 4-hydroxy- $\beta$ -ionol and LC-MS analysis to detect 4-hydroxy- $\beta$ -ionyl  
881 glucoside produced by UGTs.

882 **Figure S9.** GC-MS of apocarotenoids formed by P450-mediated biotransformation of  
883  $\alpha$ -ionone to produce 3-hydroxy- $\alpha$ -ionone and LC-MS analysis to detect 3-hydroxy- $\alpha$ -  
884 ionone glucoside produced by UGTs.

885 **Figure S10.** GC-MS of apocarotenoids formed by P450-mediated biotransformation  
886 of  $\beta$ -ionone to produce 4-hydroxy- $\beta$ -ionone and LC-MS analysis to detect 4-hydroxy-  
887  $\beta$ -ionone glucoside produced by UGTs.

888 **Figure S11.** GC-MS of apocarotenoids formed by P450-mediated biotransformation  
889 of  $\alpha$ -damascone to produce 3-hydroxy- $\alpha$ -damascone and LC-MS analysis to detect 3-  
890 hydroxy- $\alpha$ -damascone glucoside produced by UGTs.

891 **Figure S12.** GC-MS of apocarotenoids formed by P450-mediated biotransformation  
892 of  $\beta$ -damascone to produce 4-hydroxy- $\beta$ -damascone and LC-MS analysis to detect 4-  
893 hydroxy- $\beta$ -damascone glucoside produced by UGTs.

894 **Figure S13.** Reconstitution of apocarotenoid glucosides by MpUGT86C10 from a  
895 mint aglycone library.

896 **Figure S14.** Fraction 10 of the tobacco aglycone library was used as substrate  
897 source for recombinant NbUGT72AY1 from *N. benthamiana*.

898 **Figure S15.** LC-MS analysis (combined extracted ion chromatograms  $m/z$  -401 and -  
899 391) of products (ionyl glucosides) obtained by enzyme activity assays with protein  
900 extracts from wild type plants.

901 **Figure S16.** LC-MS analysis (combined extracted ion chromatograms  $m/z$  -401 and -  
902 391) of products (ionyl glucosides) obtained by enzyme activity assays with protein  
903 extracts from control plants (agroinfiltrated with an empty vector).

904 **Figure S17.** LC-MS analysis (combined extracted ion chromatograms  $m/z$  -401 and -  
905 391) of products (ionyl glucosides) obtained by enzyme activity assays with protein  
906 extracts from *MpUGT86C10*-infiltrated plants.

907

908 **Table S1.** Apocarotenoids used in the study, their molecular weights (MW), as well as  
909 the molecular weights and diagnostic ions of their glucosides.

910 **Table S2.** UGTs amino acids sequence identities (%).

911 **Table S3.** The optimal reaction conditions for each UGT for the kinetic assay  
912 determined with UDP Glo™ assay.

913 **Table S4.** Primers used for amplification of the UGT genes and overexpression qRT-  
914 PCR. fwd = forward, rev = reverse

915

## 916 References

- 917 **Ahkami A, Johnson SR, Srividya N, Lange BM** (2015) Multiple levels of regulation  
918 determine monoterpene essential oil compositional variation in the mint family.  
919 *Mol Plant* 8:188–191. <https://doi.org/10.1016/j.molp.2014.11.009>
- 920 Ahrazem O, Rubio-Moraga A, Jimeno ML, Gómez-Gómez L (2015) Structural  
921 characterization of highly glucosylated crocins and regulation of their biosynthesis  
922 during flower development in *Crocus*. *Front Plant Sci* 6:971.  
923 <https://doi.org/10.3389/fpls.2015.00971>
- 924 Asada K, Salim V, Masada-Atsumi S, Edmunds E, Nagatoshi M, Terasaka K,  
925 Mizukami H, Luca V de (2013) A 7-deoxyloganetic acid glucosyltransferase  
926 contributes a key step in secologanin biosynthesis in Madagascar periwinkle.  
927 *Plant Cell* 25:4123–4134. <https://doi.org/10.1105/tpc.113.115154>
- 928 Augustin JM, Drok S, Shinoda T, Sanmiya K, Nielsen JK, Khakimov B, Olsen CE,  
929 Hansen EH, Kuzina V, Ekstrøm CT, Hauser T, Bak S (2012) UDP-  
930 glycosyltransferases from the UGT73C subfamily in *Barbarea vulgaris* catalyze  
931 sapogenin 3-O-glucosylation in saponin-mediated insect resistance. *Plant Physiol*  
932 160:1881–1895. <https://doi.org/10.1104/pp.112.202747>
- 933 Avendaño-Vázquez A-O, Córdoba E, Llamas E, San Román C, Nisar N, La Torre S  
934 de, Ramos-Vega M, La Gutiérrez-Nava MdL, Cazzonelli CI, Pogson BJ, León P  
935 (2014) An uncharacterized apocarotenoid-derived signal generated in  $\zeta$ -carotene  
936 desaturase mutants regulates leaf development and the expression of chloroplast  
937 and nuclear genes in *Arabidopsis*. *Plant Cell* 26:2524–2537.  
938 <https://doi.org/10.1105/tpc.114.123349>
- 939 Bhat WW, Dhar N, Razdan S, Rana S, Mehra R, Nargotra A, Dhar RS, Ashraf N,  
940 Vishwakarma R, Lattoo SK (2013) Molecular characterization of UGT94F2 and  
941 UGT86C4, two glycosyltransferases from *Picrorhiza kurroa*: comparative  
942 structural insight and evaluation of substrate recognition. *PLoS ONE* 8:e73804.  
943 <https://doi.org/10.1371/journal.pone.0073804>
- 944 Bolt AJN, Purkis SW, Sadd JS (1983) A damascone derivative from *Nicotiana*  
945 *tabacum*. *Phytochemistry* 22:613–614. [https://doi.org/10.1016/0031-](https://doi.org/10.1016/0031-9422(83)83068-4)  
946 [9422\(83\)83068-4](https://doi.org/10.1016/0031-9422(83)83068-4)
- 947 Bönisch F, Frotscher J, Stanitzek S, Rühl E, Wüst M, Bitz O, Schwab W (2014)  
948 Activity-based profiling of a physiologic aglycone library reveals sugar acceptor  
949 promiscuity of family 1 UDP-glycosyltransferases from grape. *Plant Physiol*  
950 166:23–39. <https://doi.org/10.1104/pp.114.242578>
- 951 Bowles D, Isayenkova J, Lim E-K, Poppenberger B (2005) Glycosyltransferases:  
952 managers of small molecules. *Curr Opin Plant Biol* 8:254–263.  
953 <https://doi.org/10.1016/j.pbi.2005.03.007>
- 954 Busch M, Seuter A, Hain R (2002) Functional analysis of the early steps of  
955 carotenoid biosynthesis in tobacco. *Plant Physiol* 128:439–453.  
956 <https://doi.org/10.1104/pp.010573>
- 957 Cai K, Zhao H, Xiang Z, Cai B, Pan W, Lei B (2014) Enzymatic hydrolysis followed by  
958 gas chromatography-mass spectroscopy for determination of glycosides in

- 959 tobacco and method optimization by response surface methodology. *Anal.*  
960 *Methods* 6:7006. <https://doi.org/10.1039/C4AY01056F>
- 961 Çalış İ, Kuruüzüm-Uz A, Lorenzetto PA, Rüedi P (2002) (6S)-Hydroxy-3-oxo- $\alpha$ -ionol  
962 glucosides from *Capparis spinosa* fruits. *Phytochemistry* 59:451–457.  
963 [https://doi.org/10.1016/S0031-9422\(01\)00399-5](https://doi.org/10.1016/S0031-9422(01)00399-5)
- 964 Caputi L, Malnoy M, Goremykin V, Nikiforova S, Martens S (2012) A genome-wide  
965 phylogenetic reconstruction of family 1 UDP-glycosyltransferases revealed the  
966 expansion of the family during the adaptation of plants to life on land. *Plant J*  
967 69:1030–1042. <https://doi.org/10.1111/j.1365-313X.2011.04853.x>
- 968 Cataldo VF, López J, Cárcamo M, Agosin E (2016) Chemical vs. biotechnological  
969 synthesis of C13-apocarotenoids: current methods, applications and perspectives.  
970 *Appl Microbiol Biotechnol* 100:5703–5718. [https://doi.org/10.1007/s00253-016-](https://doi.org/10.1007/s00253-016-7583-8)  
971 [7583-8](https://doi.org/10.1007/s00253-016-7583-8)
- 972 Cazzonelli CI, Pogson BJ (2010) Source to sink: regulation of carotenoid  
973 biosynthesis in plants. *Trends Plant Sci* 15:266–274.  
974 <https://doi.org/10.1016/j.tplants.2010.02.003>
- 975 Croteau RB, Davis EM, Ringer KL, Wildung MR (2005) (-)-Menthol biosynthesis and  
976 molecular genetics. *Naturwissenschaften* 92:562–577.  
977 <https://doi.org/10.1007/s00114-005-0055-0>
- 978 D'Abrosca B, DellaGreca M, Fiorentino A, Monaco P, Oriano P, Temussi F (2004)  
979 Structure elucidation and phytotoxicity of C13 nor-isoprenoids from *Cestrum*  
980 *parqui*. *Phytochemistry* 65:497–505.  
981 <https://doi.org/10.1016/j.phytochem.2003.11.018>
- 982 Dickinson AJ, Lehner K, Mi J, Jia K-P, Mijar M, Dinneny J, Al-Babili S, Benfey PN  
983 (2019)  $\beta$ -Cyclocitral is a conserved root growth regulator. *Proc Natl Acad Sci U S*  
984 *A* 116:10563–10567. <https://doi.org/10.1073/pnas.1821445116>
- 985 Dietz H, Winterhalter P (1996) Phytotoxic constituents from *Bunias orientalis* leaves.  
986 *Phytochemistry* 42:1005–1010. [https://doi.org/10.1016/0031-9422\(96\)00020-9](https://doi.org/10.1016/0031-9422(96)00020-9)
- 987 Direccion G, Ahrazem O, Rubio-Moraga Á, Fiore A, Sevi F, Argandoña J, Gómez-  
988 Gómez L (2019) UGT709G1: a novel UDP-glycosyltransferase involved in the  
989 biosynthesis of picrocrocin, the precursor of safranal in saffron (*Crocus sativus*).  
990 *New Phytol* 224:725–740. <https://doi.org/10.1111/nph.16079>
- 991 Effenberger I, Hoffmann T, Jonczyk R, Schwab W (2019) Novel biotechnological  
992 glucosylation of high-impact aroma chemicals, 3(2H)- and 2(5H)-furanones. *Sci*  
993 *Rep* 9:10943. <https://doi.org/10.1038/s41598-019-47514-9>
- 994 Erenler R, Telci İ, Elmastas M, Aksit H, Gül F, Tüfekci AR, Demirtas İ, Kayir Ö (2018)  
995 Quantification of flavonoids isolated from *Mentha spicata* in selected clones of  
996 Turkish mint landraces. *Turk J Chem* 42:1695–1705. [https://doi.org/10.3906/kim-](https://doi.org/10.3906/kim-1712-3)  
997 [1712-3](https://doi.org/10.3906/kim-1712-3)
- 998 Erthmann PØ, Agerbirk N, Bak S (2018) A tandem array of UDP-glycosyltransferases  
999 from the UGT73C subfamily glycosylate saponin, forming a spectrum of  
1000 mono- and bisdesmosidic saponins. *Plant Mol Biol* 97:37–55.  
1001 <https://doi.org/10.1007/s11103-018-0723-z>
- 1002 Finkelstein R (2013) Abscisic acid synthesis and response. *Arabidopsis Book* 11.  
1003 <https://doi.org/10.1199/tab.0166>
- 1004 Fray RG, Wallace A, Fraser PD, Valero D, Hedden P, Bramley PM, Grierson D (1995)  
1005 Constitutive expression of a fruit phytoene synthase gene in transgenic tomatoes

- 1006 causes dwarfism by redirecting metabolites from the gibberellin pathway. *Plant J*  
1007 8:693–701. <https://doi.org/10.1046/j.1365-313X.1995.08050693.x>
- 1008 Ghimire BK, Ghimire B, Yu CY, Chung I-M (2019) Allelopathic and autotoxic effects  
1009 of *Medicago sativa*-derived allelochemicals. *Plants (Basel)* 8.  
1010 <https://doi.org/10.3390/plants8070233>
- 1011 Giuliano G (2014) Plant carotenoids: genomics meets multi-gene engineering. *Curr*  
1012 *Opin Plant Biol* 19:111–117. <https://doi.org/10.1016/j.pbi.2014.05.006>
- 1013 Goodin MM, Zaitlin D, Naidu RA, Lommel SA (2008) *Nicotiana benthamiana*: its  
1014 history and future as a model for plant-pathogen interactions. *Mol Plant Microbe*  
1015 *Interact* 21:1015–1026. <https://doi.org/10.1094/MPMI-21-8-1015>
- 1016 He Q, Zhang Y, Zhou S, She S, Chen G, Chen K, Yan Z, Guo D (2015) Estimating  
1017 the aroma glycosides in flue-cured tobacco by solid-phase extraction and gas  
1018 chromatography-mass spectrometry: changes in the bound aroma profile during  
1019 leaf maturity. *Flavour Fragr J* 30:230–237. <https://doi.org/10.1002/ffj.3235>
- 1020 Hou X, Rivers J, León P, McQuinn RP, Pogson BJ (2016) Synthesis and function of  
1021 apocarotenoid signals in plants. *Trends Plant Sci* 21:792–803.  
1022 <https://doi.org/10.1016/j.tplants.2016.06.001>
- 1023 Huang F-C, Horváth G, Molnár P, Turcsi E, Deli J, Schrader J, Sandmann G,  
1024 Schmidt H, Schwab W (2009) Substrate promiscuity of RdCCD1, a carotenoid  
1025 cleavage oxygenase from *Rosa damascena*. *Phytochemistry* 70:457–464.  
1026 <https://doi.org/10.1016/j.phytochem.2009.01.020>
- 1027 Imatomi M, Novaes P, Matos AP, Gualtieri SCJ, Molinillo JMG, Lacret R, Varela RM,  
1028 Macías FA (2013) Phytotoxic effect of bioactive compounds isolated from *Myrcia*  
1029 *tomentosa* (Myrtaceae) leaves. *Biochem. Syst. Ecol.* 46:29–35.  
1030 <https://doi.org/10.1016/j.bse.2012.09.005>
- 1031 Ito K, Tanabe Y, Kato S, Yamamoto T, Saito A, Mori M (2000) Glycosidic fraction of  
1032 flue-cured tobacco leaves: its separation and component analysis. *Biosci*  
1033 *Biotechnol Biochem* 64:584–587
- 1034 Ito H, Kobayashi E, Li S-H, Hatano T, Sugita D, Kubo N, Shimura S, Itoh Y, Yoshida  
1035 T (2001) Megastigmane glycosides and an acylated triterpenoid from *Eriobotrya*  
1036 *japonica*. *J Nat Prod* 64:737–740. <https://doi.org/10.1021/np010004x>
- 1037 Jassbi AR, Zare S, Asadollahi M, Schuman MC (2017) Ecological roles and biological  
1038 activities of specialized metabolites from the genus *Nicotiana*. *Chem Rev*  
1039 117:12227–12280. <https://doi.org/10.1021/acs.chemrev.7b00001>
- 1040 Jing T, Zhang N, Gao T, Zhao M, Jin J, Chen Y, Xu M, Wan X, Schwab W, Song C  
1041 (2019) Glucosylation of (Z)-3-hexenol informs intraspecies interactions in plants:  
1042 A case study in *Camellia sinensis*. *Plant Cell Environ* 42:1352–1367.  
1043 <https://doi.org/10.1111/pce.13479>
- 1044 Jones P, Messner B, Nakajima J-I, Schäffner AR, Saito K (2003) UGT73C6 and  
1045 UGT78D1, glycosyltransferases involved in flavonol glycoside biosynthesis in  
1046 *Arabidopsis thaliana*. *J Biol Chem* 278:43910–43918.  
1047 <https://doi.org/10.1074/jbc.M303523200>
- 1048 Kato-Noguchi H, Yamamoto M, Tamura K, Teruya T, Suenaga K, Fujii Y (2010)  
1049 Isolation and identification of potent allelopathic substances in rattail fescue. *Plant*  
1050 *Growth Regul.* 60:127–131. <https://doi.org/10.1007/s10725-009-9428-2>
- 1051 Khatri Y, Girhard M, Romankiewicz A, Ringle M, Hannemann F, Urlacher VB, Hutter  
1052 MC, Bernhardt R (2010) Regioselective hydroxylation of norisoprenoids by

- 1053 CYP109D1 from *Sorangium cellulosum* So ce56. Appl Microbiol Biotechnol  
1054 88:485–495. <https://doi.org/10.1007/s00253-010-2756-3>
- 1055 Kobayashi A, Kato-Noguchi H (2015) Phytotoxic substance with allelopathic activity  
1056 in *Brachiaria decumbens*. Nat. Prod. Comm. 10:1934578X1501000515.  
1057 <https://doi.org/10.1177/1934578X1501000515>
- 1058 Kodama H, Fujimori T, Katō K (1981) Isolation of a new terpene glucoside, 3-  
1059 hydroxy-5,6-epoxy- $\beta$ -ionyl- $\beta$ -D-glucopyranoside from flue-cured tobacco. Agric.  
1060 Biol. Chem. 45:941–944. <https://doi.org/10.1080/00021369.1981.10864615>
- 1061 Kodama H, Fujimori T, Kato K (1984) Glucosides of ionone-related compounds in  
1062 several *Nicotiana* species. Phytochemistry 23:583–585.  
1063 [https://doi.org/10.1016/S0031-9422\(00\)80386-6](https://doi.org/10.1016/S0031-9422(00)80386-6)
- 1064 Kong C-H, Xuan TD, Khanh TD, Tran H-D, Trung NT (2019) Allelochemicals and  
1065 signaling chemicals in plants. Molecules 24.  
1066 <https://doi.org/10.3390/molecules24152737>
- 1067 Kong CH, Zhao H, Xu XH, Wang P, Gu Y (2007) Activity and allelopathy of soil of  
1068 flavone O-glycosides from rice. J Agric Food Chem 55:6007–6012.  
1069 <https://doi.org/10.1021/jf0703912>
- 1070 Kourelis J, Kaschani F, Grosse-Holz FM, Homma F, Kaiser M, van der Hoorn RAL  
1071 (2018) Homology-guided re-annotation improves the gene models of the allopoloid  
1072 *Nicotiana benthamiana*. bioRxiv 373506 1. <https://doi.org/10.1101/373506>
- 1073 Lanot A, Hodge D, Lim E-K, Vaistij FE, Bowles DJ (2008) Redirection of flux through  
1074 the phenylpropanoid pathway by increased glucosylation of soluble intermediates.  
1075 Planta 228:609–616. <https://doi.org/10.1007/s00425-008-0763-8>
- 1076 Lätari K, Wüst F, Hübner M, Schaub P, Beisel KG, Matsubara S, Beyer P, Welsch R  
1077 (2015) Tissue-specific apocarotenoid glycosylation contributes to carotenoid  
1078 homeostasis in *Arabidopsis* leaves. Plant Physiol 168:1550–1562.  
1079 <https://doi.org/10.1104/pp.15.00243>
- 1080 Litzenburger M, Bernhardt R (2016) Selective oxidation of carotenoid-derived aroma  
1081 compounds by CYP260B1 and CYP267B1 from *Sorangium cellulosum* So ce56.  
1082 Appl Microbiol Biotechnol 100:4447–4457. <https://doi.org/10.1007/s00253-015-7269-7>
- 1084 Llanos GG, Varela RM, Jiménez IA, Molinillo JMG, Macías FA, Bazzocchi IL (2010)  
1085 Metabolites from *Withania aristata* with potential phytotoxic activity. Nat. Prod.  
1086 Comm. 5:1043-1047. <https://doi.org/10.1177/1934578X1000500712>
- 1087 Lohse S, Schliemann W, Ammer C, Kopka J, Strack D, Fester T (2005) Organization  
1088 and metabolism of plastids and mitochondria in arbuscular mycorrhizal roots of  
1089 *Medicago truncatula*. Plant Physiol 139:329–340.  
1090 <https://doi.org/10.1104/pp.105.061457>
- 1091 Macías FA, Lacret R, Varela RM, Nogueiras C, Molinillo JMG (2008) Bioactive  
1092 apocarotenoids from *Tectona grandis*. Phytochemistry 69:2708–2715.  
1093 <https://doi.org/10.1016/j.phytochem.2008.08.018>
- 1094 Mathieu S, Wirth J, Sauvage F-X, Lepoutre J-P, Baumes R, Gunata Z (2009)  
1095 Biotransformation of C13-norisoprenoids and monoterpenes by a cell suspension  
1096 culture of cv. Gamay (*Vitis vinifera*). Plant Cell Tiss Organ Cult 97:203–213.  
1097 <https://doi.org/10.1007/s11240-009-9516-z>
- 1098 Moraga AR, Nohales PF, Pérez JAF, Gómez-Gómez L (2004) Glucosylation of the  
1099 saffron apocarotenoid crocetin by a glucosyltransferase isolated from *Crocus*  
1100 *sativus* stigmas. Planta 219:955–966. <https://doi.org/10.1007/s00425-004-1299-1>

- 1101 Mushtaq W, Siddiqui MB (2018) Allelopathy in Solanaceae plants. *J. Plant Prot. Res.*  
1102 58:1–7. <https://doi.org/10.24425/119113>
- 1103 Nagatoshi M, Terasaka K, Owaki M, Sota M, Inukai T, Nagatsu A, Mizukami H (2012)  
1104 UGT75L6 and UGT94E5 mediate sequential glucosylation of crocetin to crocin in  
1105 *Gardenia jasminoides*. *FEBS Lett* 586:1055–1061.  
1106 <https://doi.org/10.1016/j.febslet.2012.03.003>
- 1107 Neugebauer W, Winterhalter P, Schreier P (1995) 3-Hydroxy- $\alpha$ -ionyl- $\beta$ -D-  
1108 glucopyranosides from stinging nettle (*Urtica dioica* L.) leaves. *Nat Prod Lett*  
1109 6:177–180. <https://doi.org/10.1080/10575639508043155>
- 1110 Nisar N, Li L, Lu S, Khin NC, Pogson BJ (2015) Carotenoid metabolism in plants. *Mol*  
1111 *Plant* 8:68–82. <https://doi.org/10.1016/j.molp.2014.12.007>
- 1112 Noguchi A, Fukui Y, Iuchi-Okada A, Kakutani S, Satake H, Iwashita T, Nakao M,  
1113 Umezawa T, Ono E (2008) Sequential glucosylation of a furofuran lignan, (+)-  
1114 sesaminol, by *Sesamum indicum* UGT71A9 and UGT94D1 glucosyltransferases.  
1115 *Plant J* 54:415–427. <https://doi.org/10.1111/j.1365-313X.2008.03428.x>
- 1116 Ohmiya A (2009) Carotenoid cleavage dioxygenases and their apocarotenoid  
1117 products in plants. *Plant Biotechnol.* 26:351–358.  
1118 <https://doi.org/10.5511/plantbiotechnology.26.351>
- 1119 Ohmiya A, Kishimoto S, Aida R, Yoshioka S, Sumitomo K (2006) Carotenoid  
1120 cleavage dioxygenase (CmCCD4a) contributes to white color formation in  
1121 *Chrysanthemum* petals. *Plant Physiol* 142:1193–1201.  
1122 <https://doi.org/10.1104/pp.106.087130>
- 1123 Ono E, Fukuchi-Mizutani M, Nakamura N, Fukui Y, Yonekura-Sakakibara K,  
1124 Yamaguchi M, Nakayama T, Tanaka T, Kusumi T, Tanaka Y (2006) Yellow  
1125 flowers generated by expression of the aurone biosynthetic pathway. *Proc Natl*  
1126 *Acad Sci U S A* 103:11075–11080. <https://doi.org/10.1073/pnas.0604246103>
- 1127 Pabst A, Barron D, Sémont E, Schreier P (1992a) An  $\alpha$ -ionol disaccharide glycoside  
1128 from raspberry fruit. *Phytochemistry* 31:2043–2046. [https://doi.org/10.1016/0031-](https://doi.org/10.1016/0031-9422(92)80359-M)  
1129 9422(92)80359-M
- 1130 Pabst A, Barron D, Sémon E, Schreier P (1992b) Two diastereomeric 3-oxo- $\alpha$ -ionol  
1131  $\beta$ -D-glucosides from raspberry fruit. *Phytochemistry* 31:1649–1652
- 1132 Pardo F, Perich F, Torres R, Monache FD (1998) Phytotoxic iridoid glucosides from  
1133 the roots of *Verbascum thapsus*. *J. Chem. Ecol.* 24:645–653.  
1134 <https://doi.org/10.1023/A:1022338118561>
- 1135 Park H, Kreunen SS, Cuttriss AJ, DellaPenna D, Pogson BJ (2002) Identification of  
1136 the carotenoid isomerase provides insight into carotenoid biosynthesis,  
1137 prolamellar body formation, and photomorphogenesis. *Plant Cell* 14:321–332.  
1138 <https://doi.org/10.1105/tpc.010302>
- 1139 Park S, Takano Y, Matsuura H, Yoshihara T (2004) Antifungal compounds from the  
1140 root and root exudate of *Zea mays*. *Appl Environ Microbiol* 68:1366–1368.  
1141 <https://doi.org/10.1271/bbb.68.1366>
- 1142 Poppenberger B, Fujioka S, Soeno K, George GL, Vaistij FE, Hiranuma S, Seto H,  
1143 Takatsuto S, Adam G, Yoshida S, Bowles D (2005) The UGT73C5 of *Arabidopsis*  
1144 *thaliana* glucosylates brassinosteroids. *Proc Natl Acad Sci U S A* 102:15253–  
1145 15258. <https://doi.org/10.1073/pnas.0504279102>
- 1146 Putkaradze N, Litzenburger M, Abdulmughni A, Milhim M, Brill E, Hannemann F,  
1147 Bernhardt R (2017) CYP109E1 is a novel versatile statin and terpene oxidase



- 1148 from *Bacillus megaterium*. Appl Microbiol Biotechnol 101:8379–8393.  
1149 <https://doi.org/10.1007/s00253-017-8552-6>
- 1150 Rodríguez-Bustamante E, Sánchez S (2007) Microbial production of C13-  
1151 norisoprenoids and other aroma compounds via carotenoid cleavage. Crit Rev  
1152 Microbiol 33:211–230. <https://doi.org/10.1080/10408410701473306>
- 1153 Salt SD, Tuzun S, Kuć J (1986) Effects of  $\beta$ -ionone and abscisic acid on the growth  
1154 of tobacco and resistance to blue mold. Mimicry of effects of stem infection by  
1155 *Peronospora tabacina* Adam. Physiol Mol Plant P 28:287–297.  
1156 [https://doi.org/10.1016/S0048-4059\(86\)80071-6](https://doi.org/10.1016/S0048-4059(86)80071-6)
- 1157 Schmidt H, Kurtzer R, Eisenreich W, Schwab W (2006) The carotenase AtCCD1 from  
1158 *Arabidopsis thaliana* is a dioxygenase. J Biol Chem 281:9845–9851.  
1159 <https://doi.org/10.1074/jbc.M511668200>
- 1160 Schoch E, Benda I, Schreier P (1991) Bioconversion of  $\alpha$ -damascone by *Botrytis*  
1161 *cinerea*. Appl Environ Microbiol 57:15–18
- 1162 Schwab W, Schreier P (1990) Vomifoliol 1-O- $\beta$ -D-xylopyranosyl-6-O- $\beta$ -D-  
1163 glucopyranoside: A disaccharide glycoside from apple fruit. Phytochemistry  
1164 29:161–164. [https://doi.org/10.1016/0031-9422\(90\)89030-D](https://doi.org/10.1016/0031-9422(90)89030-D)
- 1165 Sgorbini B, Cagliero C, Pagani A, Sganzerla M, Boggia L, Bicchi C, Rubiolo P (2015)  
1166 Determination of free and glucosidically-bound volatiles in plants. Two case  
1167 studies: L-menthol in peppermint (*Mentha x piperita* L.) and eugenol in clove  
1168 (*Syzygium aromaticum* (L.) Merr. & L.M.Perry). Phytochemistry 117:296–305.  
1169 <https://doi.org/10.1016/j.phytochem.2015.06.017>
- 1170 Simon C, Langlois-Meurinne M, Didierlaurent L, Chaouch S, Bellvert F, Massoud K,  
1171 Garmier M, Thareau V, Comte G, Noctor G, Saindrenan P (2014) The secondary  
1172 metabolism glycosyltransferases UGT73B3 and UGT73B5 are components of  
1173 redox status in resistance of Arabidopsis to *Pseudomonas syringae* pv. tomato.  
1174 Plant Cell Environ 37:1114–1129. <https://doi.org/10.1111/pce.12221>
- 1175 Song C, Le Gu, Liu J, Zhao S, Hong X, Schulenburg K, Schwab W (2015) Functional  
1176 characterization and substrate promiscuity of UGT71 glycosyltransferases from  
1177 strawberry (*Fragaria x ananassa*). Plant Cell Physiol 56:2478–2493.  
1178 <https://doi.org/10.1093/pcp/pcv151>
- 1179 Song C, Härtl K, McGraphery K, Hoffmann T, Schwab W (2018) Attractive but toxic:  
1180 emerging roles of glycosidically bound volatiles and glycosyltransferases involved  
1181 in their formation. Mol Plant 11:1225–1236.  
1182 <https://doi.org/10.1016/j.molp.2018.09.001>
- 1183 Strack D, Fester T (2006) Isoprenoid metabolism and plastid reorganization in  
1184 arbuscular mycorrhizal roots. New Phytol 172:22–34.  
1185 <https://doi.org/10.1111/j.1469-8137.2006.01837.x>
- 1186 Sun G, Strebl M, Merz M, Blamberg R, Huang F-C, McGraphery K, Hoffmann T,  
1187 Schwab W (2019) Glucosylation of the phytoalexin N-feruloyl tyramine modulates  
1188 the levels of pathogen-responsive metabolites in *Nicotiana benthamiana*. Plant J  
1189 100:20–37. <https://doi.org/10.1111/tbj.14420>
- 1190 Takagi Y, Fujimori T, Hata T, Kaneko H, Kato K (1980) Isolation of a new tobacco  
1191 constituent, 5,6-dihydro-5-hydroxy-3,6-epoxy- $\beta$ -ionol, from Japanese domestic  
1192 suifu tobacco. Agric. Biol. Chem. 44:705–706
- 1193 Tang Y-X, Suga T (1994) Biotransformation of  $\alpha$ - and  $\beta$ -ionones by immobilized cells  
1194 of *Nicotiana tabacum*. Phytochemistry 37:737–740.  
1195 [https://doi.org/10.1016/S0031-9422\(00\)90349-2](https://doi.org/10.1016/S0031-9422(00)90349-2)

- 1196 Tian L (2015) Recent advances in understanding carotenoid-derived signaling  
1197 molecules in regulating plant growth and development. *Front Plant Sci* 6:790.  
1198 <https://doi.org/10.3389/fpls.2015.00790>
- 1199 Tommasi N de, Piacente S, Simone F de, Pizza C (1996) Constituents of *Cydonia*  
1200 *vulgaris* : isolation and structure elucidation of four new flavonol glycosides and  
1201 nine new  $\alpha$ -ionol-derived glycosides. *J Agric Food Chem* 44:1676–1681.  
1202 <https://doi.org/10.1021/jf950547a>
- 1203 Vining KJ, Johnson SR, Ahkami A, Lange I, Parrish AN, Trapp SC, Croteau RB,  
1204 Straub SCK, Pandelova I, Lange BM (2017) Draft Genome Sequence of *Mentha*  
1205 *longifolia* and Development of Resources for Mint Cultivar Improvement. *Mol*  
1206 *Plant* 10:323–339. <https://doi.org/10.1016/j.molp.2016.10.018>
- 1207 Wahlberg I, Enzell CR (1987) Tobacco isoprenoids. *Nat Prod Rep* 4:237.  
1208 <https://doi.org/10.1039/np9870400237>
- 1209 Walter MH, Strack D (2011) Carotenoids and their cleavage products: biosynthesis  
1210 and functions. *Nat Prod Rep* 28:663–692. <https://doi.org/10.1039/c0np00036a>
- 1211 Walter MH, Floss DS, Strack D (2010) Apocarotenoids: hormones, mycorrhizal  
1212 metabolites and aroma volatiles. *Planta* 232:1–17.  
1213 <https://doi.org/10.1007/s00425-010-1156-3>
- 1214 Wang J, Hou B (2009) Glycosyltransferases: key players involved in the modification  
1215 of plant secondary metabolites. *Front Biol China* 4:39–46.  
1216 <https://doi.org/10.1007/s11515-008-0111-1>
- 1217 Wang Y-W, Wang W-C, Jin S-H, Wang J, Wang B, Hou B-K (2012) Over-expression  
1218 of a putative poplar glycosyltransferase gene, PtGT1, in tobacco increases lignin  
1219 content and causes early flowering. *J Exp Bot* 63:2799–2808.  
1220 <https://doi.org/10.1093/jxb/ers001>
- 1221 Wang M, Schäfer M, Li D, Halitschke R, Dong C, McGale E, Paetz C, Song Y, Li S,  
1222 Dong J, Heiling S, Groten K, Franken P, Bitterlich M, Harrison MJ, Paszkowski U,  
1223 Baldwin IT (2018) Blumenols as shoot markers of root symbiosis with arbuscular  
1224 mycorrhizal fungi. *eLife* 7. <https://doi.org/10.7554/eLife.37093>
- 1225 Weston LA, Ryan PR, Watt M (2012) Mechanisms for cellular transport and release  
1226 of allelochemicals from plant roots into the rhizosphere. *J Exp Bot* 63:3445–3454.  
1227 <https://doi.org/10.1093/jxb/ers054>
- 1228 Winterhalter P, Rouseff R (2002) Carotenoid-Derived Aroma Compounds: An  
1229 Introduction. In: Winterhalter P, Rouseff RL (eds) *Carotenoid-derived aroma*  
1230 *compounds: Based on a symposium sponsored by the ACS Division of*  
1231 *Agricultural and Food Chemistry, presented at the 219th national meeting of the*  
1232 *American Chemical Society, San Francisco, California, March 26 - 30, 2000, vol*  
1233 *802. American Chemical Society, Washington, DC, pp 1–17*
- 1234 Wirth J, Guo W, Baumes R, Günata Z (2001) Volatile compounds released by  
1235 enzymatic hydrolysis of glycoconjugates of leaves and grape berries from *Vitis*  
1236 *vinifera* Muscat of Alexandria and Shiraz cultivars. *J Agric Food Chem* 49:2917–  
1237 2923. <https://doi.org/10.1021/jf001398l>
- 1238 Wu B, Cao X, Liu H, Zhu C, Klee H, Zhang B, Chen K (2019) UDP-  
1239 glucosyltransferase PpUGT85A2 controls volatile glycosylation in peach. *J Exp*  
1240 *Bot* 70:925–936. <https://doi.org/10.1093/jxb/ery419>
- 1241 Wurtzel ET (2019) Changing form and function through carotenoids and synthetic  
1242 biology. *Plant Physiol* 179:830–843. <https://doi.org/10.1104/pp.18.01122>

- 1243 Yazaki K, Sugiyama A, Morita M, Shitan N (2008) Secondary transport as an efficient  
1244 membrane transport mechanism for plant secondary metabolites. *Phytochem*  
1245 *Rev* 7:513–524. <https://doi.org/10.1007/s11101-007-9079-8>
- 1246 Yin Q, Shen G, Chang Z, Tang Y, Gao H, Pang Y (2017) Involvement of three  
1247 putative glucosyltransferases from the UGT72 family in flavonol  
1248 glucoside/rhamnoside biosynthesis in *Lotus japonicus* seeds. *J Exp Bot* 68:597–  
1249 612. <https://doi.org/10.1093/jxb/erw420>
- 1250 Zeng S, Sun S, Liu S, Hu J, He B (2014) Synthesis of  $\alpha$ -ionyl- $\beta$ -d-glucoside and its  
1251 property of flavor release. *J Therm Anal Calorim* 115:1049–1056.  
1252 <https://doi.org/10.1007/s10973-013-3439-y>
- 1253 Zhang C (2018) Biosynthesis of carotenoids and apocarotenoids by microorganisms  
1254 and their industrial potential. In: Queiroz Zepka L (ed) *Progress in carotenoid*  
1255 *research*. IntechOpen, London, DOI: 10.5772/intechopen.79061
- 1256 Zhao X, Dai X, Gao L, Guo L, Zhuang J, Liu Y, Ma X, Wang R, Xia T, Wang Y (2017)  
1257 Functional analysis of an uridine diphosphate glycosyltransferase involved in the  
1258 biosynthesis of polyphenolic glucoside in tea plants (*Camellia sinensis*). *J Agric*  
1259 *Food Chem* 65:10993–11001. <https://doi.org/10.1021/acs.jafc.7b04969>
- 1260 Zhou X, Welsch R, Yang Y, Álvarez D, Riediger M, Yuan H, Fish T, Liu J,  
1261 Thannhauser TW, Li L (2015) Arabidopsis OR proteins are the major  
1262 posttranscriptional regulators of phytoene synthase in controlling carotenoid  
1263 biosynthesis. *Proc Natl Acad Sci U S A* 112:3558–3563.  
1264 <https://doi.org/10.1073/pnas.1420831112>  
1265  
1266

1267

**Table 1. C<sub>13</sub>-Apocarotenol screening of UGTs by LC-MS.** *In vitro* reaction products were analyzed by LC-MS. The color code shows increasing reactivity from white to green color (maximum activity in dark green corresponding to 100%; 100% indicates the enzyme with the highest activity towards the specific substrate). The chemical structure illustrates the derived preferred glycosylation sites of the UGTs.

| substrates                     | NbUGT72AY1 | NbUGT73A24 | NbUGT73A25 | NbUGT85A73 | MpUGT86C10 | MpUGT709C6 |
|--------------------------------|------------|------------|------------|------------|------------|------------|
| $\alpha$ -Ionol                | 77         | 77         | 100        | 21         | 66         | 7          |
| $\beta$ -Ionol                 | 51         | 86         | 100        | 26         | 57         | 23         |
| 3-Hydroxy- $\alpha$ -ionol     | 73         | 55         | 100        | 7          | 96         | 2          |
| 4-Hydroxy- $\beta$ -ionol      | 27         | 90         | 100        | 2          | 81         | 9          |
| 3-Hydroxy- $\alpha$ -ionone    | 1          | 2          | 4          | 1          | 100        | 0          |
| 4-Hydroxy- $\beta$ -ionone     | 6          | 12         | 67         | 2          | 100        | 4          |
| 3-Hydroxy- $\alpha$ -damascone | 4          | 20         | 50         | 29         | 100        | 0          |
| 4-Hydroxy- $\beta$ -damascone  | 0          | 0          | 9          | 15         | 100        | 43         |
| 3-Oxo- $\alpha$ -ionol         | 100        | 37         | 25         | 0          | 45         | 0          |

  

preferred glucosylations sites of UGTs

NbUGT73A25  
 NbUGT73A24  
 NbUGT72AY1  
 MpUGT86C10

MpUGT86C10  
 NbUGT73A25

MpUGT86C10  
 NbUGT73A25

1268

1269

1270

1271

**Table 2. Michaelis-Menten kinetic parameters of NbUGT72AY1, NbUGT73A24, NbUGT73A25, MpUGT86C10, and MpUGT709C6.** Kinetics were determined for  $\alpha$ -ionol and  $\beta$ -ionol using the UDP Glo™ assay.

|            | Substrate       | $K_M$ [ $\mu$ M] | $v_{max}$ [nmol min <sup>-1</sup> mg <sup>-1</sup> ] | $k_{cat}$ [sec <sup>-1</sup> ] | $k_{cat}/K_M$ [M <sup>-1</sup> sec <sup>-1</sup> ] |
|------------|-----------------|------------------|------------------------------------------------------|--------------------------------|----------------------------------------------------|
| NbUGT72AY1 | $\alpha$ -ionol | 17.4 ± 7.9       | 9.8 ± 0.7                                            | 0.013                          | 749                                                |
|            | $\beta$ -ionol  | 13.1 ± 6.8       | 5.0 ± 1.1                                            | 0.007                          | 507                                                |
| NbUGT73A24 | $\alpha$ -ionol | 32.81 ± 8.8      | 18.5 ± 2.5                                           | 0.025                          | 750                                                |
|            | $\beta$ -ionol  | 34.01 ± 3.9      | 18.4 ± 0.2                                           | 0.024                          | 718                                                |
| NbUGT73A25 | $\alpha$ -ionol | 106.0 ± 22.2     | 64.4 ± 4.5                                           | 0.086                          | 811                                                |
|            | $\beta$ -ionol  | 131.4 ± 18.3     | 155.6 ± 7.1                                          | 0.208                          | 1580                                               |
| MpUGT86C10 | $\alpha$ -ionol | 23.8 ± 3.7       | 14.0 ± 0.8                                           | 0.019                          | 786                                                |
|            | $\beta$ -ionol  | 6.0 ± 2.1        | 7.0 ± 1.4                                            | 0.009                          | 1575                                               |
| MpUGT709C6 | $\alpha$ -ionol | 27.2 ± 0.4       | 1.3 ± 0.1                                            | 0.002                          | 65                                                 |
|            | $\beta$ -ionol  | 28.7 ± 7.5       | 7.2 ± 1.3                                            | 0.010                          | 336                                                |

1272

1273

1274

1275

## 1276 **Figure Legends**

1277 **Fig. 1. Identification of C<sub>13</sub>-apocarotenyl glucosides formed by UGTs from *N.***  
1278 ***benthamia* and *M. × piperita*.** (a) Combined ion traces (extracted ion chromatogram  
1279 EIC) *m/z* 391 [M+Cl]<sup>-</sup> and *m/z* 401 [M+HCOO]<sup>-</sup> (ionyl glucosides) as well as *m/z* 405  
1280 [M+Cl]<sup>-</sup> and *m/z* 415 [M+HCOO]<sup>-</sup> (3-oxo- $\alpha$ -ionyl glucoside). (b) mass spectra (-MS)  
1281 and product ion spectra (-MS<sup>2</sup>). Diagnostic ions are explained in [Supplemental Table](#)  
1282 [S1](#). Glc glucopyranose.

1283

1284 **Fig. 2. A mint aglycone library was used as substrate source for recombinant**  
1285 **MpUGT86C10 from *M. × piperita*.** (a) Volatile metabolites released by glucosidase  
1286 (Rapidase) from a mint glycoside extract (aglycone library) were analyzed by GC-MS.  
1287 C<sub>13</sub>-apocarotenoids are shown in red boxes. BHT butylated hydroxytoluene stabilizer.  
1288 (b) The aglycone library was subsequently employed as substrates for MpUGT86C10.  
1289 The mint glycoside extract and the aglycone library incubated with empty vector  
1290 control served as positive and negative control, respectively. Diagnostic ions are  
1291 explained in [Supplemental Table S1](#).

1292

1293 **Fig. 3. Agroinfiltration of *NbUGT72AY1*, *NbUGT73A24*, *NbUGT73A25*,**  
1294 ***MpUGT86C10* and *MpUGT709C6* in *N. benthamiana*.** (a) QPCR analysis was  
1295 performed with WT, CO and agroinfiltrated leaves (*NbUGT72AY1*, *NbUGT73A24*,  
1296 *NbUGT73A25*, *MpUGT86C10* and *MpUGT709C6*). Tobacco UGTs were analyzed at  
1297 7 d and mint UGTs at 10 d post-infiltration. Triplicates were analyzed. (b) Products  
1298 obtained by enzyme assays with protein extracts from the WT, empty vector control,  
1299 *NbUGT72AY1*-, *NbUGT73A24*-, *NbUGT73A25*-, *MpUGT86C10*- and *MpUGT709C6*-  
1300 infiltrated leaves and the substrates  $\alpha$ -ionol were analyzed by LC-MS. *MpUGT709C6*  
1301 and *MpUGT86C10* extracts were incubated at 30 °C for 2 h, all other extracts were  
1302 incubated at 30 °C for 1 h. Ionyl glucoside (indicated by a black arrow) was detected  
1303 at ion trace *m/z* 401 [M+HCOO]<sup>-</sup> and verified by MS<sup>2</sup> analysis. A co-eluting plant  
1304 metabolite is indicated by a black asterisk. (c) Same as in (b) but  $\beta$ -ionol was used  
1305 as substrate. Phenotypes of WT, CO and *UGT86C10*-infiltrated leaves are shown on  
1306 the right side.

1307

1308 **Fig. 4. Co-infiltration of *MpUGT86C10* and potential substrates ( $\alpha$ - and  $\beta$ -ionol)**  
1309 **into *N. benthamiana* leaves.** (a) LC-MS analysis of extracts obtained from infiltrated  
1310 leaves to detect ionyl glucosides at  $m/z$  -401 and -391. Untreated wild type plants WT,  
1311 plants infiltrated with an empty vector CO, and infiltrated with *UGT86C10*. (b)  
1312 Detection of 7,8-dihydro-ionyl glucoside at  $m/z$  -393 and -403. (c) Mean  
1313 concentration ( $\mu\text{g/g}$  fresh weight) of triplicate measurements.

1314

1315 **Fig. 5. Germination of *N. benthamiana* seeds in the presence of  $\text{C}_{13}$ -**  
1316 **apocarotenols.** (a) Effect of 0.1-100 mM  $\alpha$ -ionol and  $\alpha$ -ionyl glucoside on *N.*  
1317 *benthamiana* seedlings. Triplicates of 20 seeds per plate were analyzed. (b)  
1318 Germination rate and embryo size in % after application of 0.1-100 mM of  $\alpha$ -ionol and  
1319  $\alpha$ -ionyl glucoside. Data are presented as mean  $\pm$  SE of three repetitions (twenty  
1320 seeds per treatment). Asterisks indicate significant differences in comparison with the  
1321 lowest concentration (Student's t-test: \* $P < 0.05$ ).

1322

1323 **Fig. 6. Formation of apocarotenyl glucosides in *M. x piperita* and *N.***  
1324 ***benthamiana*.**

1325

1326

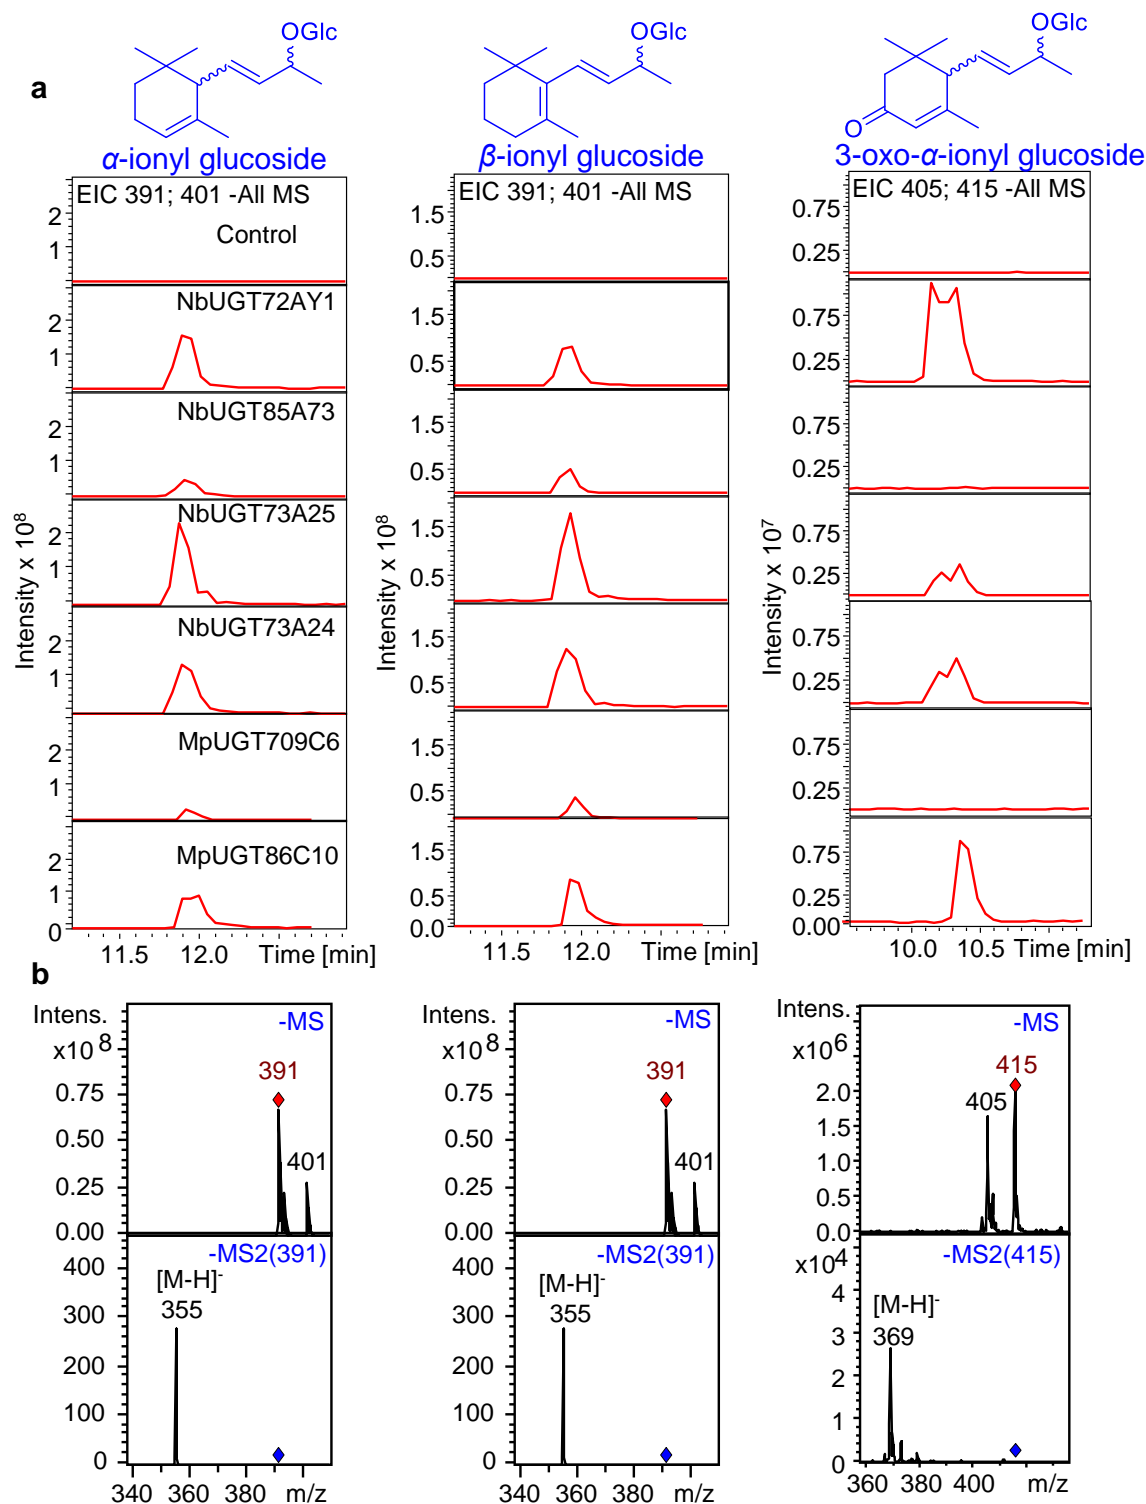

**Figure 1. Identification of  $C_{13}$ -apocarotenyl glucosides formed by UGTs from *N. benthamia* and *M. × piperita*.** (a) Combined ion traces (extracted ion chromatogram EIC)  $m/z$  391  $[M+Cl]^-$  and  $m/z$  401  $[M+HCOO]^-$  (ionyl glucosides) as well as  $m/z$  405  $[M+Cl]^-$  and  $m/z$  415  $[M+HCOO]^-$  (3-oxo- $\alpha$ -ionyl glucoside). (b) mass spectra (-MS) and product ion spectra (-MS2). Diagnostic ions are explained in [Supplemental Table S2](#). Glc glucopyranose.

1327

1328



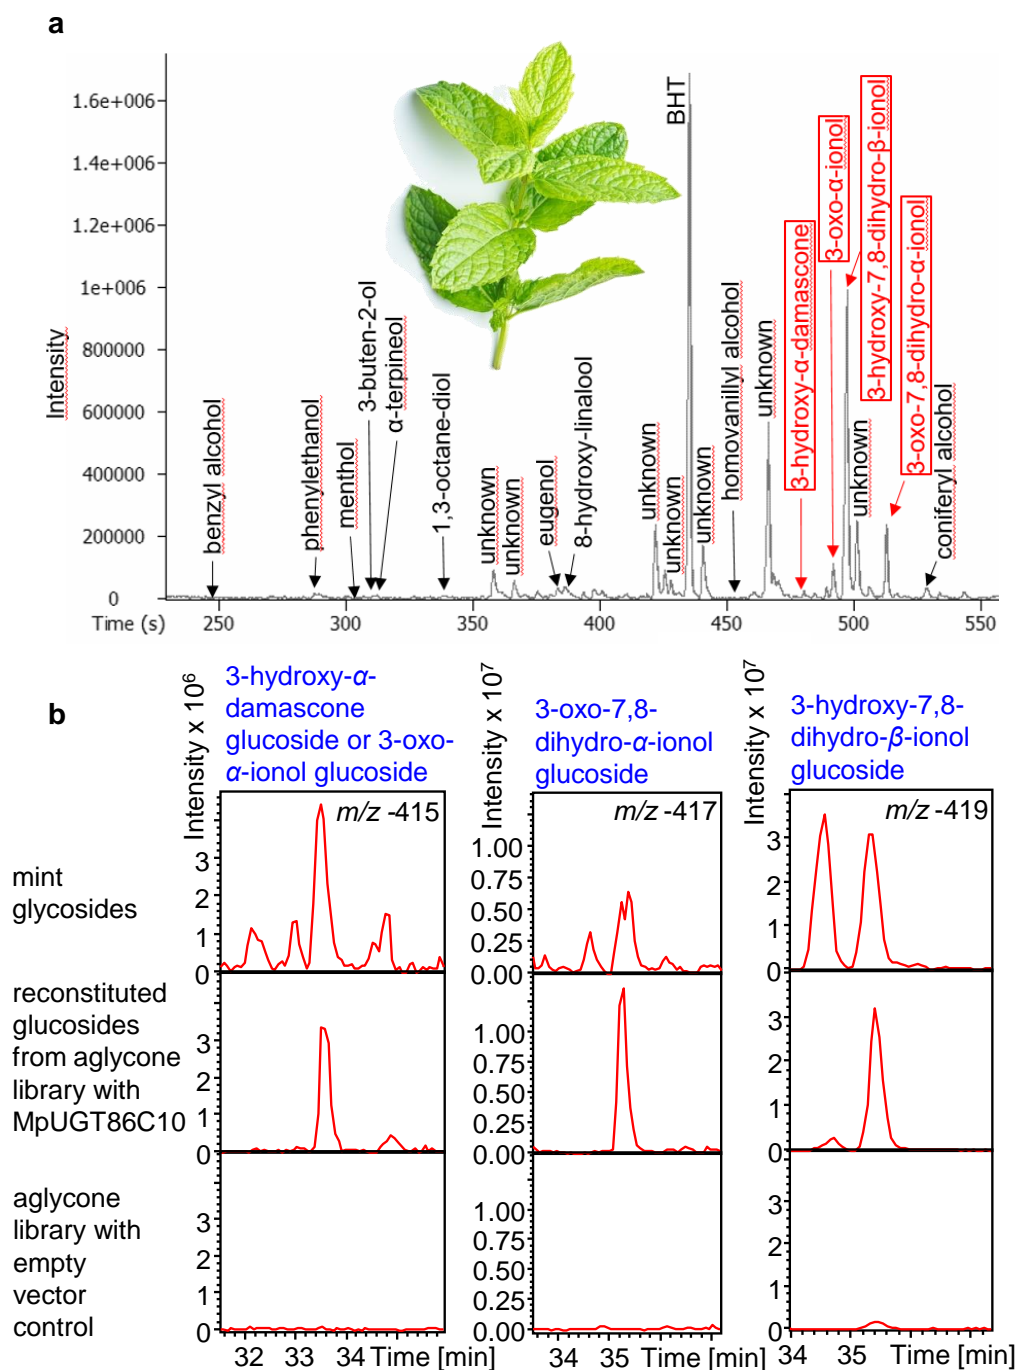

**Figure 2. A mint aglycone library was used as substrate source for recombinant MpUGT86C10 from *M. × piperita*.** (a) Volatile metabolites released by glucosidase (Rapidase) from a mint glycoside extract (aglycone library) were analyzed by GC-MS. C<sub>13</sub>-apocarotenoids are shown in red boxes. BHT butylated hydroxytoluene stabilizer. (b) The aglycone library was subsequently employed as substrates for MpUGT86C10. The mint glycoside extract and the aglycone library incubated with empty vector control served as positive and negative control, respectively. Diagnostic ions are explained in [Supplemental Table S2](#).

1329

1330

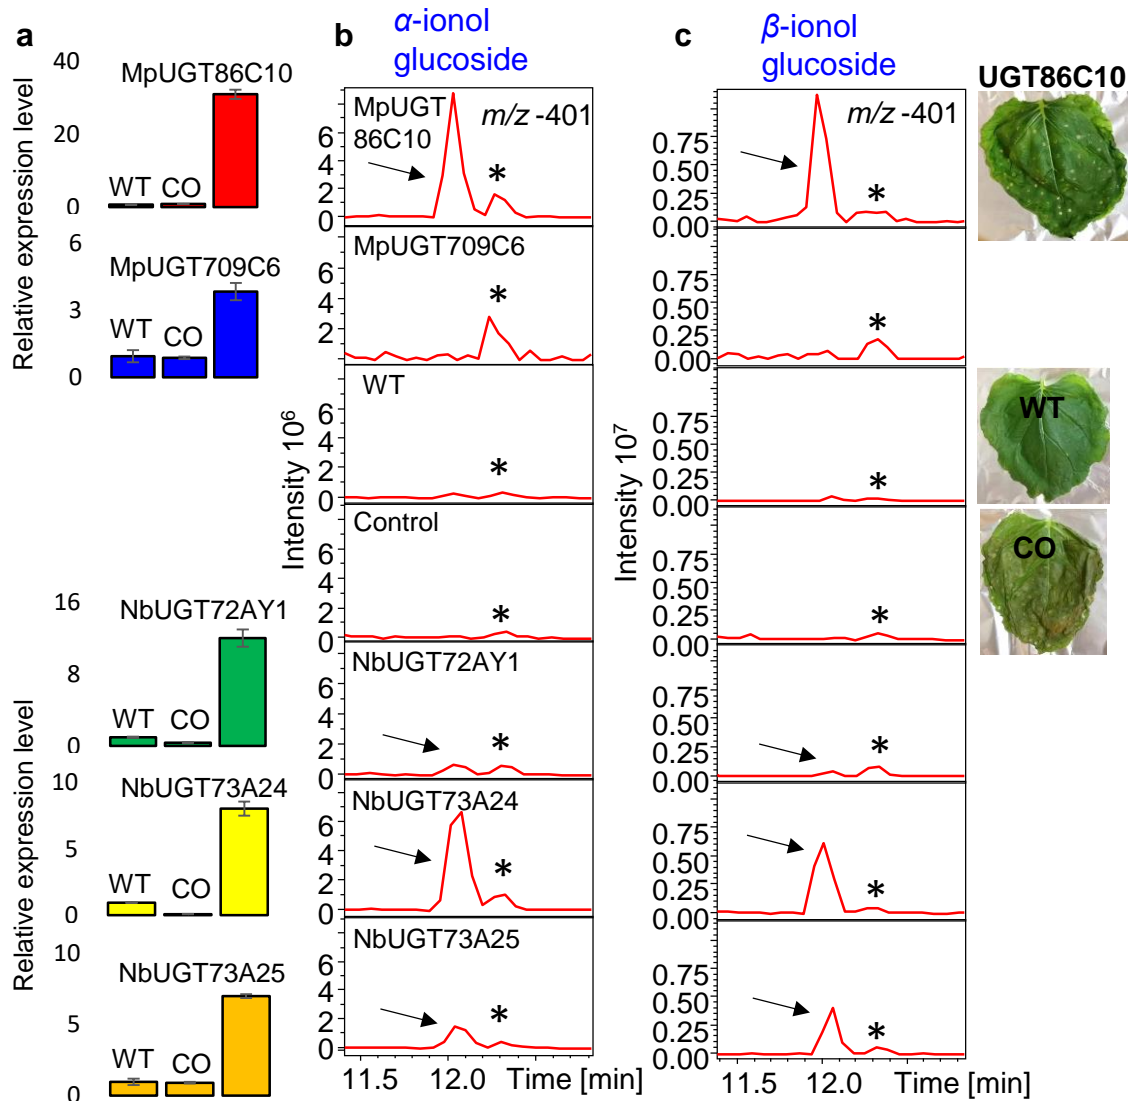

**Figure 3. Agroinfiltration of *NbUGT72AY1*, *NbUGT73A24*, *NbUGT73A25*, *MpUGT86C10* and *MpUGT709C6* in *N. benthamiana*.** (a) QPCR analysis was performed with WT, CO and agroinfiltrated leaves (*NbUGT72AY1*, *NbUGT73A24*, *NbUGT73A25*, *MpUGT86C10* and *MpUGT709C6*). Tobacco UGTs were analyzed at 7 d and mint UGTs at 10 d post-infiltration. Triplicates were analyzed. (b) Products obtained by enzyme assays with protein extracts from the WT, empty vector control, *NbUGT72AY1*-, *NbUGT73A24*-, *NbUGT73A25*-, *MpUGT86C10*- and *MpUGT709C6*-infiltrated leaves and the substrates  $\alpha$ -ionol were analyzed by LC-MS. *MpUGT709C6* and *MpUGT86C10* extracts were incubated at 30 °C for 2 h, all other extracts were incubated at 30 °C for 1 h. Ionol glucoside (indicated by a black arrow) was detected at ion trace  $m/z$  401  $[M+HCOO]^-$  and verified by MS2 analysis. A co-eluting plant metabolite is indicated by a black asterisk. (c) Same as in (b) but  $\beta$ -ionol was used as substrate. Phenotypes of WT, CO and *UGT86C10*-infiltrated leaves are shown on the right side.

1331

1332

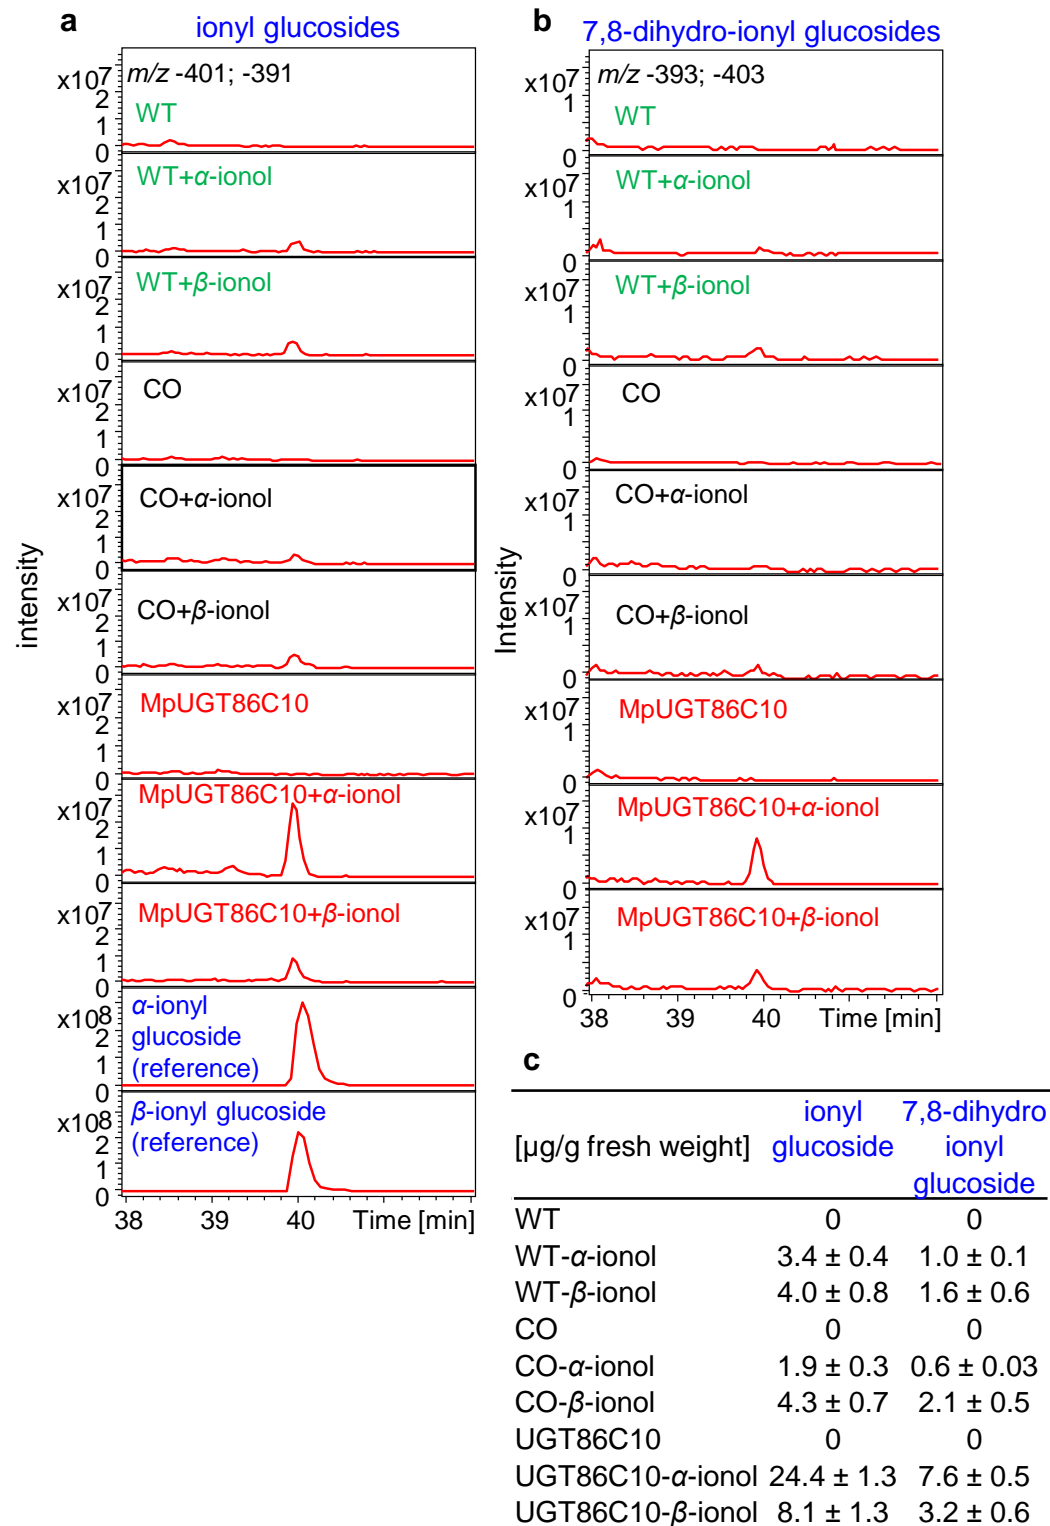

**Figure 4. Co-infiltration of *MpUGT86C10* and potential substrates ( $\alpha$ - and  $\beta$ -ionol) into *N. benthamiana* leaves. (a) LC-MS analysis of extracts obtained from infiltrated leaves to detect ionyl glucosides at  $m/z$  -401 and -391. Untreated wild type plants WT, plants infiltrated with an empty vector CO, and infiltrated with *UGT86C10*. (b) Detection of 7,8-dihydro-ionyl glucoside at  $m/z$  -393 and -403. (c) Mean concentration ( $\mu\text{g/g}$  fresh weight) of triplicate measurements.**

1333

1334

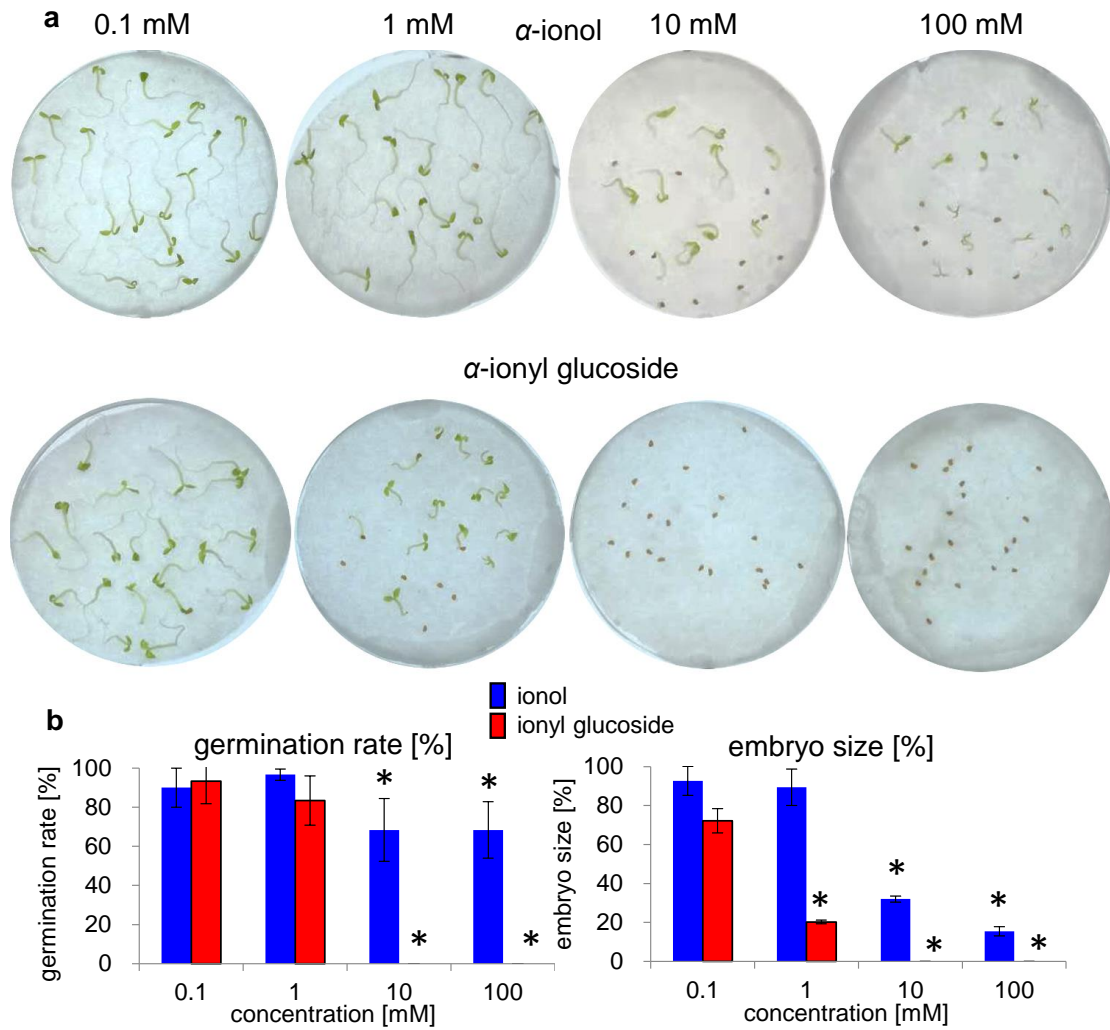

**Figure 5. Germination of *N. benthamiana* seeds in the presence of C<sub>13</sub>-apocarotenols.** (a) Effect of 0.1-100 mM α-ionol and α-ionyl glucoside on *N. benthamiana* seedlings. Triplicates of 20 seeds per plate were analyzed. (b) Germination rate and embryo size in % after application of 0.1-100 mM of α-ionol and α-ionyl glucoside. Data are presented as mean ± SE of three repetitions (twenty seeds per treatment). Asterisks indicate significant differences in comparison with the lowest concentration (Student's t-test: \*P < 0.05).

1335

1336

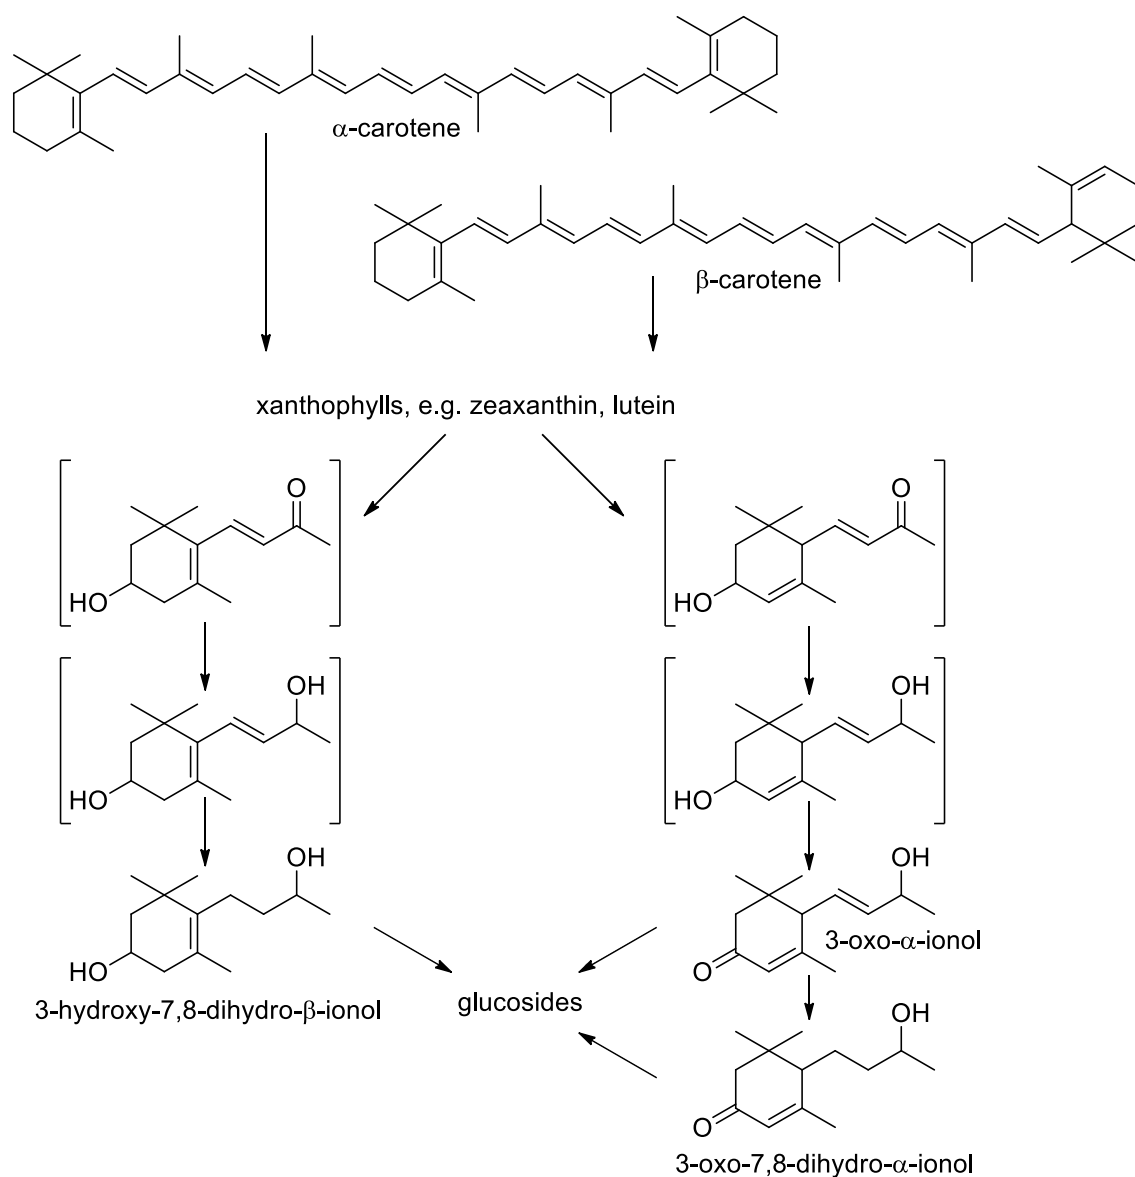

**Figure 6. Formation of apocarotenyl glucosides in *M. × piperita* and *N. benthamiana*.**

1337
